# Supplementary material for: A theoretical study on the photochemical generation of phenylborylene from phenyldiazidoborane
Source: Royal Society of Chemistry journal article supplement (doi:10.1039/d2cp05349g), 2023-01-01
Supplement: d2cp05349g1.pdf [file d2cp05349g1.pdf]

## Supplementary Information

for

# Theoretical Study on the Photochemical Generation of Phenylborylene from Phenyl diazidoborane

Di Mu, Quan-Song Li\*

Key Laboratory of Cluster Science of Ministry of Education, Beijing Key Laboratory of Photoelectronic/Electrophotonic Conversion Materials, School of Chemistry and Chemical Engineering, Beijing Institute of Technology, 100081 Beijing, China

E-mail: [liquansong@bit.edu.cn](mailto:liquansong@bit.edu.cn)

| Contents                                                                                                                                      | Starting Page |
|-----------------------------------------------------------------------------------------------------------------------------------------------|---------------|
| Table SI1. CASPT2 energies of the critical points optimized by CASSCF.                                                                        | SI3           |
| Table SI2. TD-B3LYP vertical excitations at <b>1</b> -S <sub>0</sub> .                                                                        | SI9           |
| Table SI3. TD-CAM-B3LYP vertical excitations at <b>1</b> -S <sub>0</sub> .                                                                    | SI10          |
| Table SI4. CASPT2 vertical excitations at <b>3</b> -S <sub>0</sub> .                                                                          | SI11          |
| Table SI5. CASPT2 vertical excitations at <b>4</b> -S <sub>0</sub> .                                                                          | SI12          |
| Table SI6. Structure difference of <b>1</b> -S <sub>0</sub> and <b>1</b> -S <sub>1</sub> by TD-DFT and CASSCF                                 | SI13          |
| Figure SI1. The (10,10) active orbitals of <b>7</b> in the CASPT2 calculations.                                                               | SI14          |
| Figure SI2. The (8,8) active orbitals of <b>8</b> in the CASPT2 calculations.                                                                 | SI15          |
| Figure SI3. DFT-optimized ground-state structure of <b>1</b> .                                                                                | SI16          |
| Figure SI4. CASPT2 energy profiles for the first dinitrogen extrusion from the three conformers of PhBN <sub>6</sub> in S <sub>1</sub> state. | SI17          |
| Figure SI5. CASPT2 energy plot from <b>1</b> -S <sub>0</sub> to <b>1</b> -S <sub>1</sub> .                                                    | SI18          |

|                                                                                                                  |      |
|------------------------------------------------------------------------------------------------------------------|------|
| Figure SI6. CASPT2 energy plot from <b>TS1-S<sub>1</sub></b> to $(S_1/S_0)_{x-a}$ .                              | SI19 |
| Figure SI7. CASPT2 energy plot from $(S_1/S_0)_{x-a}$ to <b>2-S<sub>0</sub></b> .                                | SI20 |
| Figure SI8. CASPT2 energy plot along shorten C-N distance from $(S_1/S_0)_{x-a}$ .                               | SI21 |
| Figure SI9. CASPT2 energy plot and key points structures for <b>2-S<sub>0</sub></b> to <b>5-S<sub>0</sub></b> .  | SI22 |
| Figure SI10. CASPT2 energy plot from <b>2-S<sub>0</sub></b> to <b>4-S<sub>0</sub></b> .                          | SI23 |
| Figure SI11. CASPT2 energy plot from <b>2-S<sub>0</sub></b> to <b>5-S<sub>0</sub></b> .                          | SI24 |
| Figure SI12. CASPT2 energy plot from <b>3-S<sub>0</sub></b> to <b>3-S<sub>1</sub></b> .                          | SI25 |
| Figure SI13. CASPT2 energy plot from <b>TS4-S<sub>1</sub></b> to <b>6-S<sub>1</sub></b> .                        | SI26 |
| Figure SI14. CASPT2 energy plot from <b>6-S<sub>1</sub></b> to <b>6-S<sub>0</sub></b> .                          | SI27 |
| Figure SI15. CASPT2 energy plot from <b>4-S<sub>0</sub></b> to <b>7-S<sub>1</sub></b> .                          | SI28 |
| Figure SI16. CASPT2 energy plot from <b>7-S<sub>1</sub></b> to <b>7-S<sub>0</sub></b> .                          | SI29 |
| Figure SI17. CASPT2 energy plot from <b>7-S<sub>0</sub></b> to <b>8-S<sub>0</sub></b> .                          | SI30 |
| Figure SI18. CASPT2 energy plot and key points structures for <b>5-S<sub>0</sub></b> to <b>8-S<sub>0</sub></b> . | SI31 |
| Figure SI19. The key orbitals of <b>8</b> .                                                                      | SI32 |
| Cartesian coordinates of optimized structures.                                                                   | SI33 |

Table SII. Absolute and relative CASPT2 energies of the critical points optimized by CASSCF.

| Structure                 | State          | CASPT2 (Hartree) | CASPT2 (eV) | Active space |
|---------------------------|----------------|------------------|-------------|--------------|
| <b>1-S<sub>0</sub></b>    | S <sub>0</sub> | -583.3284927     | 0.00        | (12,12)      |
|                           | S <sub>1</sub> | -583.1609861     | 4.56        |              |
|                           | S <sub>2</sub> | -583.1515229     | 4.82        |              |
|                           | S <sub>3</sub> | -583.1216329     | 5.63        |              |
|                           | S <sub>4</sub> | -583.1171281     | 5.75        |              |
| <b>1-S<sub>1</sub></b>    | S <sub>0</sub> | -583.3244261     | 0.11        | (12,12)      |
|                           | S <sub>1</sub> | -583.1702636     | 4.31        |              |
|                           | S <sub>2</sub> | -583.1547236     | 4.73        |              |
|                           | S <sub>3</sub> | -583.1172515     | 5.75        |              |
|                           | S <sub>4</sub> | -583.1167437     | 5.76        |              |
| <b>TS1-S<sub>0</sub></b>  | S <sub>0</sub> | -583.2490184     | 2.16        | (12,12)      |
|                           | S <sub>1</sub> | -583.0683265     | 7.08        |              |
|                           | S <sub>2</sub> | -583.0494569     | 7.59        |              |
|                           | S <sub>3</sub> | -583.0136398     | 8.57        |              |
|                           | S <sub>4</sub> | -582.9978595     | 9.00        |              |
| <b>TS1-S<sub>1</sub></b>  | S <sub>0</sub> | -583.2367581     | 2.50        | (12,12)      |
|                           | S <sub>1</sub> | -583.1657039     | 4.43        |              |
|                           | S <sub>2</sub> | -583.1331886     | 5.31        |              |
|                           | S <sub>3</sub> | -583.1017790     | 6.17        |              |
|                           | S <sub>4</sub> | -583.0267012     | 8.21        |              |
| <b>TS1'-S<sub>1</sub></b> | S <sub>0</sub> | -583.2523689     | 2.07        | (12,12)      |
|                           | S <sub>1</sub> | -583.1577166     | 4.65        |              |
|                           | S <sub>2</sub> | -583.1113973     | 5.91        |              |
|                           | S <sub>3</sub> | -583.0908347     | 6.47        |              |
|                           | S <sub>4</sub> | -583.0674628     | 7.10        |              |
| <b>P'-S<sub>1</sub></b>   | S <sub>0</sub> | -583.2522938     | 2.07        | (12,12)      |
|                           | S <sub>1</sub> | -583.2011313     | 3.47        |              |

---

|                                 |                |               |      |         |
|---------------------------------|----------------|---------------|------|---------|
|                                 | S <sub>2</sub> | -583.1585310  | 4.62 |         |
|                                 | S <sub>3</sub> | -583.1337414  | 5.30 |         |
|                                 | S <sub>4</sub> | -583.0995175  | 6.23 |         |
| <i>anti-anti-S</i> <sub>1</sub> | S <sub>0</sub> | -583.3210576  | 0.20 | (12,12) |
|                                 | S <sub>1</sub> | -583.1725472  | 4.24 |         |
|                                 | S <sub>2</sub> | -583.1611905  | 4.55 |         |
|                                 | S <sub>3</sub> | -583.1370227  | 5.21 |         |
|                                 | S <sub>4</sub> | -583.1260224  | 5.51 |         |
| <b>TSa-S</b> <sub>1</sub>       | S <sub>0</sub> | -583.2415470  | 2.37 | (12,12) |
|                                 | S <sub>1</sub> | -583.1633819  | 4.49 |         |
|                                 | S <sub>2</sub> | -583.1360680  | 5.24 |         |
|                                 | S <sub>3</sub> | -583.0986061  | 6.26 |         |
|                                 | S <sub>4</sub> | -583.0132436  | 8.58 |         |
| <b>Pa-S</b> <sub>1</sub>        | S <sub>0</sub> | -583.24059462 | 2.39 | (12,12) |
|                                 | S <sub>1</sub> | -583.21423918 | 3.11 |         |
|                                 | S <sub>2</sub> | -583.18603848 | 3.88 |         |
|                                 | S <sub>3</sub> | -583.14484862 | 5.00 |         |
|                                 | S <sub>4</sub> | -583.12806857 | 5.45 |         |
| <i>syn-syn-S</i> <sub>1</sub>   | S <sub>0</sub> | -583.3090656  | 0.53 | (12,12) |
|                                 | S <sub>1</sub> | -583.1723769  | 4.25 |         |
|                                 | S <sub>2</sub> | -583.1327159  | 5.33 |         |
|                                 | S <sub>3</sub> | -583.1172182  | 5.75 |         |
|                                 | S <sub>4</sub> | -583.1073554  | 6.02 |         |
| <b>TSb-S</b> <sub>1</sub>       | S <sub>0</sub> | -583.2355991  | 2.07 | (12,12) |
|                                 | S <sub>1</sub> | -583.1516591  | 4.65 |         |
|                                 | S <sub>2</sub> | -583.0931768  | 5.91 |         |
|                                 | S <sub>3</sub> | -582.9975586  | 6.47 |         |
|                                 | S <sub>4</sub> | -583.0345305  | 7.10 |         |
| <b>Pb-S</b> <sub>1</sub>        | S <sub>0</sub> | -583.2240756  | 2.84 | (12,12) |
|                                 | S <sub>1</sub> | -583.2049349  | 3.36 |         |

---

---

|                                                  |                |              |       |         |
|--------------------------------------------------|----------------|--------------|-------|---------|
|                                                  | S <sub>2</sub> | -583.1548454 | 4.72  |         |
|                                                  | S <sub>3</sub> | -583.1282237 | 5.45  |         |
|                                                  | S <sub>4</sub> | -583.0909008 | 6.46  |         |
| (S <sub>1</sub> /S <sub>0</sub> ) <sub>x-a</sub> | S <sub>0</sub> | -473.9751628 | 2.39  | (12,12) |
|                                                  | S <sub>1</sub> | -473.9758073 | 2.41  |         |
|                                                  | S <sub>2</sub> | -473.9258152 | 3.75  |         |
|                                                  | S <sub>3</sub> | -473.9249885 | 3.77  |         |
|                                                  | S <sub>4</sub> | -473.9126182 | 4.12  |         |
| <b>2-S<sub>0</sub></b>                           | S <sub>0</sub> | -474.0072930 | 1.58  | (12,12) |
|                                                  | S <sub>1</sub> | -473.8826885 | 4.97  |         |
|                                                  | S <sub>2</sub> | -473.8329160 | 6.32  |         |
|                                                  | S <sub>3</sub> | -473.8304170 | 6.39  |         |
|                                                  | S <sub>4</sub> | -473.8285090 | 6.44  |         |
| <b>3-S<sub>0</sub></b>                           | S <sub>0</sub> | -474.0994295 | -0.97 | (12,12) |
|                                                  | S <sub>1</sub> | -473.9309309 | 3.61  |         |
|                                                  | S <sub>2</sub> | -473.9019674 | 4.40  |         |
|                                                  | S <sub>3</sub> | -473.8914893 | 4.68  |         |
|                                                  | S <sub>4</sub> | -473.8800855 | 4.99  |         |
| <b>3-S<sub>1</sub></b>                           | S <sub>0</sub> | -474.0871618 | -0.64 | (12,12) |
|                                                  | S <sub>1</sub> | -473.9415529 | 3.32  |         |
|                                                  | S <sub>2</sub> | -473.8954531 | 4.57  |         |
|                                                  | S <sub>3</sub> | -473.8664305 | 5.36  |         |
|                                                  | S <sub>4</sub> | -473.8412979 | 6.05  |         |
| <b>TS2-S<sub>0</sub></b>                         | S <sub>0</sub> | -474.0049351 | 1.60  | (12,12) |
|                                                  | S <sub>1</sub> | -473.8852777 | 4.85  |         |
|                                                  | S <sub>2</sub> | -473.8485671 | 5.85  |         |
|                                                  | S <sub>3</sub> | -473.8332528 | 6.27  |         |
|                                                  | S <sub>4</sub> | -473.8262951 | 6.46  |         |
| <b>4-S<sub>0</sub></b>                           | S <sub>0</sub> | -474.0288135 | 0.95  | (12,12) |
|                                                  | S <sub>1</sub> | -473.9041035 | 4.34  |         |

---

---

|                          |                |              |       |         |
|--------------------------|----------------|--------------|-------|---------|
|                          | S <sub>2</sub> | -473.8510057 | 5.78  |         |
|                          | S <sub>3</sub> | -473.8507464 | 5.79  |         |
|                          | S <sub>4</sub> | -473.7929165 | 7.37  |         |
| <b>TS3-S<sub>0</sub></b> | S <sub>0</sub> | -474.0030297 | 1.65  | (12,12) |
|                          | S <sub>1</sub> | -473.8669756 | 5.35  |         |
|                          | S <sub>2</sub> | -473.8406450 | 6.07  |         |
|                          | S <sub>3</sub> | -473.8246147 | 6.50  |         |
|                          | S <sub>4</sub> | -473.8196416 | 6.64  |         |
| <b>5-S<sub>0</sub></b>   | S <sub>0</sub> | -364.8600421 | -1.67 | (10,10) |
|                          | S <sub>1</sub> | -364.7694048 | 0.80  |         |
|                          | S <sub>2</sub> | -364.7112030 | 2.38  |         |
|                          | S <sub>3</sub> | -364.6789045 | 3.26  |         |
|                          | S <sub>4</sub> | -364.6641059 | 3.66  |         |
| <b>TS4-S<sub>1</sub></b> | S <sub>0</sub> | -474.0322422 | 0.85  | (12,12) |
|                          | S <sub>1</sub> | -473.9281722 | 3.68  |         |
|                          | S <sub>2</sub> | -473.9206221 | 3.89  |         |
|                          | S <sub>3</sub> | -473.8742450 | 5.15  |         |
|                          | S <sub>4</sub> | -473.8618770 | 5.49  |         |
| <b>6-S<sub>0</sub></b>   | S <sub>0</sub> | -364.8083057 | -0.26 | (10,10) |
|                          | S <sub>1</sub> | -364.8020791 | -0.09 |         |
|                          | S <sub>2</sub> | -364.7486153 | 1.36  |         |
|                          | S <sub>3</sub> | -364.7430845 | 1.51  |         |
|                          | S <sub>4</sub> | -364.7156549 | 2.26  |         |
| <b>6-S<sub>1</sub></b>   | S <sub>0</sub> | -364.8013875 | -0.07 | (10,10) |
|                          | S <sub>1</sub> | -364.7967545 | 0.05  |         |
|                          | S <sub>2</sub> | -364.7727105 | 0.71  |         |
|                          | S <sub>3</sub> | -364.7596398 | 1.06  |         |
|                          | S <sub>4</sub> | -364.7160772 | 2.25  |         |
| <b>6-T<sub>1</sub></b>   | T <sub>1</sub> | -364.8342246 | -0.97 | (10,10) |
|                          | T <sub>2</sub> | -364.7590826 | 1.08  |         |

---

---

|                                                  |                |              |       |         |
|--------------------------------------------------|----------------|--------------|-------|---------|
|                                                  | T <sub>3</sub> | -364.7638096 | 0.95  |         |
|                                                  | T <sub>4</sub> | -364.7206300 | 2.12  |         |
|                                                  | T <sub>5</sub> | -364.7183913 | 2.19  |         |
| (S <sub>1</sub> /S <sub>0</sub> ) <sub>X-b</sub> | S <sub>0</sub> | -364.7984577 | 0.01  | (10,10) |
|                                                  | S <sub>1</sub> | -364.7949398 | 0.10  |         |
|                                                  | S <sub>2</sub> | -364.7716450 | 0.74  |         |
|                                                  | S <sub>3</sub> | -364.7570698 | 1.13  |         |
|                                                  | S <sub>4</sub> | -364.7142966 | 2.30  |         |
| (S <sub>2</sub> /S <sub>1</sub> ) <sub>X</sub>   | S <sub>0</sub> | -474.0136942 | 1.36  | (12,12) |
|                                                  | S <sub>1</sub> | -473.8840214 | 4.89  |         |
|                                                  | S <sub>2</sub> | -473.8683071 | 5.31  |         |
|                                                  | S <sub>3</sub> | -473.8473518 | 5.88  |         |
|                                                  | S <sub>4</sub> | -473.8450439 | 5.95  |         |
| <b>TS5-S<sub>1</sub></b>                         | S <sub>0</sub> | -473.9891231 | 2.03  | (12,12) |
|                                                  | S <sub>1</sub> | -473.9000195 | 4.45  |         |
|                                                  | S <sub>2</sub> | -473.8461131 | 5.92  |         |
|                                                  | S <sub>3</sub> | -473.8431284 | 6.00  |         |
|                                                  | S <sub>4</sub> | -473.8343970 | 6.24  |         |
| <b>7-S<sub>0</sub></b>                           | S <sub>0</sub> | -364.8229587 | -0.66 | (10,10) |
|                                                  | S <sub>1</sub> | -364.8110705 | -0.34 |         |
|                                                  | S <sub>2</sub> | -364.7447977 | 1.46  |         |
|                                                  | S <sub>3</sub> | -364.7408371 | 1.58  |         |
|                                                  | S <sub>4</sub> | -364.7081893 | 2.46  |         |
| <b>7-S<sub>1</sub></b>                           | S <sub>0</sub> | -364.8146969 | -0.43 | (10,10) |
|                                                  | S <sub>1</sub> | -364.8128576 | -0.38 |         |
|                                                  | S <sub>2</sub> | -364.7927786 | 0.16  |         |
|                                                  | S <sub>3</sub> | -364.7397265 | 1.61  |         |
|                                                  | S <sub>4</sub> | -364.6925512 | 2.89  |         |
| (S <sub>1</sub> /S <sub>0</sub> ) <sub>X-c</sub> | S <sub>0</sub> | -364.8146969 | -0.43 | (10,10) |
|                                                  | S <sub>1</sub> | -364.8128576 | -0.38 |         |

---

---

|                          |                |              |       |         |
|--------------------------|----------------|--------------|-------|---------|
|                          | S <sub>2</sub> | -364.7927786 | 0.16  |         |
|                          | S <sub>3</sub> | -364.7397265 | 1.60  |         |
|                          | S <sub>4</sub> | -364.6925512 | 2.89  |         |
| <b>TS6-S<sub>0</sub></b> | S <sub>0</sub> | -364.8177113 | -0.52 | (10,10) |
|                          | S <sub>1</sub> | -364.7813099 | 0.47  |         |
|                          | S <sub>2</sub> | -364.7222390 | 2.08  |         |
|                          | S <sub>3</sub> | -364.7000874 | 2.68  |         |
|                          | S <sub>4</sub> | -364.6858324 | 3.07  |         |
| <b>TS7-S<sub>0</sub></b> | S <sub>0</sub> | -364.7978103 | 0.02  | (10,10) |
|                          | S <sub>1</sub> | -364.7317690 | 1.82  |         |
|                          | S <sub>2</sub> | -364.7083788 | 2.46  |         |
|                          | S <sub>3</sub> | -364.6505945 | 4.03  |         |
|                          | S <sub>4</sub> | -364.6480420 | 4.10  |         |
| <b>8-S<sub>0</sub></b>   | S <sub>0</sub> | -255.5677145 | -0.92 | (8,8)   |
|                          | S <sub>1</sub> | -255.4749030 | 1.60  |         |
|                          | S <sub>2</sub> | -255.4492681 | 2.30  |         |
|                          | S <sub>3</sub> | -255.4038559 | 3.54  |         |
|                          | S <sub>4</sub> | -255.3777881 | 4.25  |         |
| <b>8-S<sub>1</sub></b>   | S <sub>0</sub> | -255.5520819 | -0.50 | (8,8)   |
|                          | S <sub>1</sub> | -255.4795905 | 1.48  |         |
|                          | S <sub>2</sub> | -255.4346554 | 2.70  |         |
|                          | S <sub>3</sub> | -255.3928474 | 3.84  |         |
|                          | S <sub>4</sub> | -255.3818350 | 4.14  |         |
| <b>8-T<sub>1</sub></b>   | T <sub>1</sub> | -255.5153701 | 0.50  | (8,8)   |
|                          | T <sub>2</sub> | -255.5142155 | 0.54  |         |
|                          | T <sub>3</sub> | -255.4381678 | 2.60  |         |
|                          | T <sub>4</sub> | -255.4052995 | 3.50  |         |
|                          | T <sub>5</sub> | -255.3823535 | 4.12  |         |

---



Table SI2. Relative TD-B3LYP vertical excitation energy ( $\Delta E$ ) and wavelength ( $\lambda$ ) at  $1-S_0$  together with the electronic configuration (weight in the parenthesis, orbital below the Table) and oscillation strength ( $f$ ).

| State           | Electronic configuration (weight)    | $\Delta E/eV$ | $\lambda/nm$ | $f$    |
|-----------------|--------------------------------------|---------------|--------------|--------|
| S <sub>0</sub>  | -                                    | 0.00          | -            | -      |
| S <sub>1</sub>  | HOMO→LUMO(0.51)<br>HOMO-1→LUMO(0.46) | 4.41          | 281          | 0.0170 |
| S <sub>2</sub>  | HOMO-1→LUMO(0.51)                    | 4.61          | 269          | 0.3299 |
| S <sub>3</sub>  | HOMO-2→LUMO(0.66)                    | 4.98          | 249          | 0.1418 |
| S <sub>4</sub>  | HOMO-3→LUMO(0.67)                    | 4.99          | 249          | 0.0003 |
| S <sub>5</sub>  | HOMO-2→LUMO+1(0.49)                  | 5.14          | 241          | 0.0000 |
| S <sub>6</sub>  | HOMO-4→LUMO(0.36)                    | 5.21          | 238          | 0.0006 |
| S <sub>7</sub>  | HOMO-4→LUMO(0.51)                    | 5.26          | 236          | 0.0000 |
| S <sub>8</sub>  | HOMO-1→LUMO+1(0.49)                  | 5.49          | 226          | 0.0001 |
| S <sub>9</sub>  | HOMO-2→LUMO+2(0.36)                  | 5.59          | 222          | 0.0004 |
| S <sub>10</sub> | HOMO→LUMO+3(0.36)                    | 5.67          | 219          | 0.0058 |

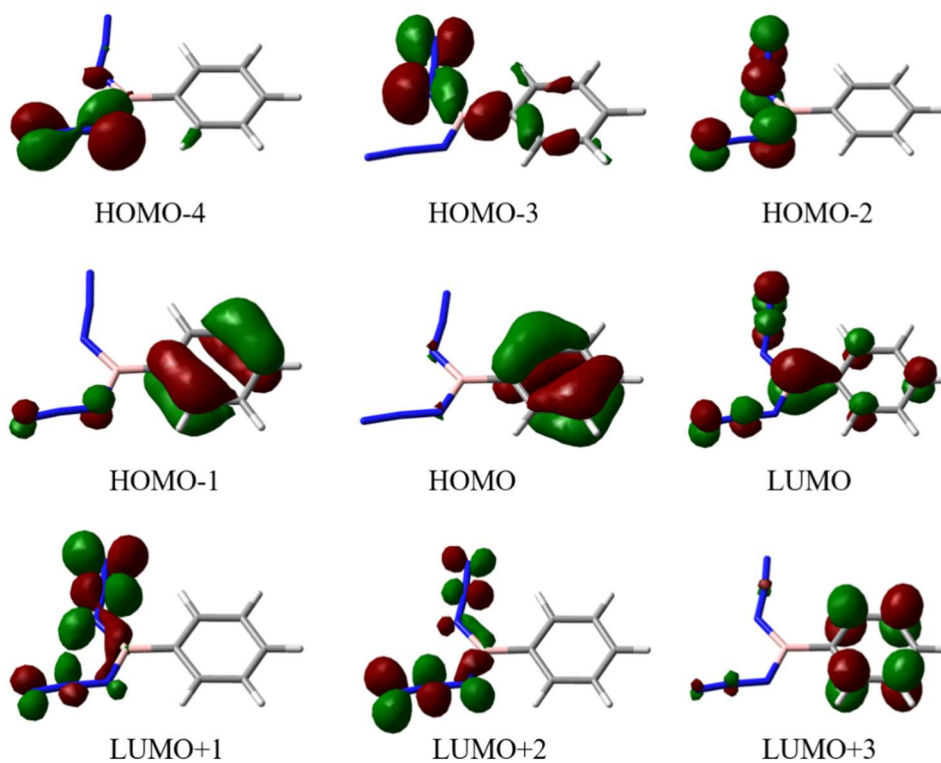

Table SI3. Relative TD-CAM-B3LYP vertical excitation energy ( $\Delta E$ ) and wavelength ( $\lambda$ ) at  $1-S_0$  together with the electronic configuration (weight in the parenthesis, orbital below the Table) and oscillation strength ( $f$ ).

| State           | Electronic configuration (weight)    | $\Delta E/eV$ | $\lambda/nm$ | $f$    |
|-----------------|--------------------------------------|---------------|--------------|--------|
| S <sub>0</sub>  | -                                    | 0.00          | -            | -      |
| S <sub>1</sub>  | HOMO-1→LUMO(0.44)<br>HOMO→LUMO(0.49) | 4.95          | 251          | 0.0355 |
| S <sub>2</sub>  | HOMO-1→LUMO(0.45)                    | 5.12          | 242          | 0.3576 |
| S <sub>3</sub>  | HOMO-2→LUMO+1(0.48)                  | 5.23          | 237          | 0.0000 |
| S <sub>4</sub>  | HOMO-2→LUMO(0.60)                    | 5.31          | 234          | 0.1265 |
| S <sub>5</sub>  | HOMO-3→LUMO (0.43)                   | 5.36          | 231          | 0.0000 |
| S <sub>6</sub>  | HOMO-3→LUMO(0.33)                    | 5.46          | 227          | 0.0013 |
| S <sub>7</sub>  | HOMO-4→LUMO(0.57)                    | 5.66          | 219          | 0.0001 |
| S <sub>8</sub>  | HOMO-3→LUMO+1(0.29)                  | 6.07          | 204          | 0.0059 |
| S <sub>9</sub>  | HOMO→LUMO+3(0.48)                    | 6.32          | 196          | 0.0706 |
| S <sub>10</sub> | HOMO-1→LUMO+3(0.50)                  | 6.56          | 189          | 0.3312 |

  

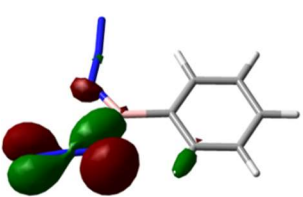

HOMO-4



HOMO-3



HOMO-2



HOMO-1



HOMO



LUMO



LUMO+1



LUMO+2



LUMO+3

Table SI4. Relative CASPT2 vertical excitation energy ( $\Delta E$ ), wavelengths ( $\lambda$ ), oscillation strength ( $f$ ), and the main configuration with weight in parenthesis at **3**-S<sub>0</sub>, where the related orbitals are shown.

| State          | Configuration (weight) | $\Delta E/eV$ | $\lambda/nm$ | $f$    |
|----------------|------------------------|---------------|--------------|--------|
| S <sub>0</sub> | 222222000000(0.82)     | 0.00          | -            | -      |
| S <sub>1</sub> | 222u2200d000(0.31)     | 4.58          | 270          | 0.0104 |
|                | 2u2222000d00(0.24)     |               |              |        |
| S <sub>2</sub> | 22u22200000d(0.73)     | 5.37          | 231          | 0.0005 |
| S <sub>3</sub> | 222u220d0000(0.78)     | 5.66          | 219          | 0.0050 |
| S <sub>4</sub> | 222u2200000d(0.71)     | 5.97          | 208          | 0.0011 |

  

“u” and “d” stand for singly occupied orbitals with electrons of spin up (u) or spin down (d)

Table SI5. Relative CASPT2 vertical excitation energy ( $\Delta E$ ), wavelengths ( $\lambda$ ), oscillation strength ( $f$ ), and the main configuration with weight in parenthesis at  $4-S_0$ , where the related orbitals are shown.

| State          | Configuration (weight) | $\Delta E/eV$ | $\lambda/nm$ | $f$    |
|----------------|------------------------|---------------|--------------|--------|
| S <sub>0</sub> | 222222000000(0.81)     | 0.00          | -            | -      |
| S <sub>1</sub> | 22222u0d0000(0.74)     | 3.39          | 365          | 0.0005 |
| S <sub>2</sub> | 22222ud00000(0.72)     | 4.84          | 256          | 0.7884 |
| S <sub>3</sub> | 2222u2d00000(0.38)     | 4.85          | 256          | 0.0096 |
| S <sub>4</sub> | u22222d00000(0.78)     | 6.42          | 193          | 0.0003 |

  

“u” and “d” stand for singly occupied orbitals with electrons of spin up (u) or spin down (d)

Table SI6. Key bond length (in angstrom ( $\text{\AA}$ )), angle and dihedral angle (in degree ( $^\circ$ )) of  $\mathbf{1-S_0}$  and  $\mathbf{1-S_1}$  optimized by TD-B3LYP, TD-CAM-B3LYP and CASSCF methods.

| 1             | B3LYP          |                |                   | CAM-B3LYP      |                |                   | CASSCF         |                |                   |
|---------------|----------------|----------------|-------------------|----------------|----------------|-------------------|----------------|----------------|-------------------|
|               | S <sub>0</sub> | S <sub>1</sub> | $\Delta(S_1-S_0)$ | S <sub>0</sub> | S <sub>1</sub> | $\Delta(S_1-S_0)$ | S <sub>0</sub> | S <sub>1</sub> | $\Delta(S_1-S_0)$ |
| C1-C2         | 1.39           | 1.45           | 0.06              | 1.39           | 1.42           | 0.03              | 1.39           | 1.44           | 0.05              |
| C2-C3         | 1.41           | 1.40           | -0.01             | 1.40           | 1.42           | 0.02              | 1.39           | 1.44           | 0.05              |
| C3-C4         | 1.41           | 1.41           | 0.00              | 1.40           | 1.43           | 0.03              | 1.41           | 1.48           | 0.07              |
| C4-C5         | 1.39           | 1.44           | 0.05              | 1.39           | 1.42           | 0.03              | 1.39           | 1.47           | 0.08              |
| C5-C6         | 1.40           | 1.39           | -0.01             | 1.39           | 1.40           | 0.01              | 1.39           | 1.47           | 0.08              |
| C1-C6         | 1.40           | 1.39           | -0.01             | 1.39           | 1.40           | 0.01              | 1.39           | 1.41           | 0.02              |
| C3-B12        | 1.55           | 1.59           | 0.04              | 1.55           | 1.52           | -0.03             | 1.58           | 1.55           | -0.03             |
| B12-N13       | 1.45           | 1.45           | 0.00              | 1.44           | 1.46           | 0.02              | 1.44           | 1.44           | 0.00              |
| B12-N14       | 1.45           | 1.43           | -0.02             | 1.44           | 1.45           | 0.01              | 1.45           | 1.45           | 0.00              |
| N13-N15       | 1.24           | 1.23           | -0.01             | 1.23           | 1.22           | -0.01             | 1.25           | 1.25           | 0.00              |
| N15-N17       | 1.14           | 1.14           | 0.00              | 1.12           | 1.13           | 0.01              | 1.11           | 1.11           | 0.00              |
| N14-N16       | 1.23           | 1.22           | -0.01             | 1.22           | 1.22           | 0.00              | 1.24           | 1.24           | 0.00              |
| N16-N18       | 1.14           | 1.15           | 0.01              | 1.12           | 1.13           | 0.01              | 1.12           | 1.12           | 0.00              |
| C1-C2-C3      | 121            | 123            | 2                 | 121            | 123            | 2                 | 122            | 124            | 2                 |
| C2-C3-C4      | 117            | 114            | -3                | 118            | 112            | -6                | 117            | 116            | -1                |
| C3-C4-C5      | 121            | 123            | 2                 | 121            | 123            | 2                 | 121            | 120            | -1                |
| C4-C5-C6      | 120            | 121            | 1                 | 120            | 122            | 2                 | 120            | 119            | -1                |
| C5-C6-C1      | 120            | 117            | -3                | 120            | 116            | -4                | 119            | 118            | -1                |
| C6-C1-C2      | 120            | 122            | 2                 | 120            | 122            | 2                 | 120            | 123            | 3                 |
| C2-C3-B12     | 124            | 125            | 1                 | 124            | 126            | 2                 | 124            | 125            | 1                 |
| C4-C3-B12     | 119            | 121            | 2                 | 119            | 121            | 2                 | 118            | 119            | 1                 |
| N13-B12-N14   | 115            | 120            | 5                 | 115            | 117            | 2                 | 115            | 116            | 1                 |
| N13-B12-C3    | 117            | 114            | -3                | 117            | 117            | 0                 | 116            | 117            | 1                 |
| N14-B12-C3    | 128            | 126            | -2                | 128            | 126            | -2                | 129            | 128            | -1                |
| B12-N13-N15   | 122            | 125            | 3                 | 121            | 122            | 1                 | 117            | 117            | 0                 |
| N13-N15-N17   | 173            | 175            | 2                 | 174            | 175            | 1                 | 174            | 174            | 0                 |
| B12-N14-N16   | 128            | 131            | 3                 | 128            | 127            | -1                | 125            | 123            | -2                |
| N14-N16-N18   | 172            | 174            | 2                 | 173            | 174            | 1                 | 172            | 173            | 1                 |
| C2-C3-B12-N14 | 3              | 0              | -3                | 0              | 10             | 10                | 1              | 21             | 20                |

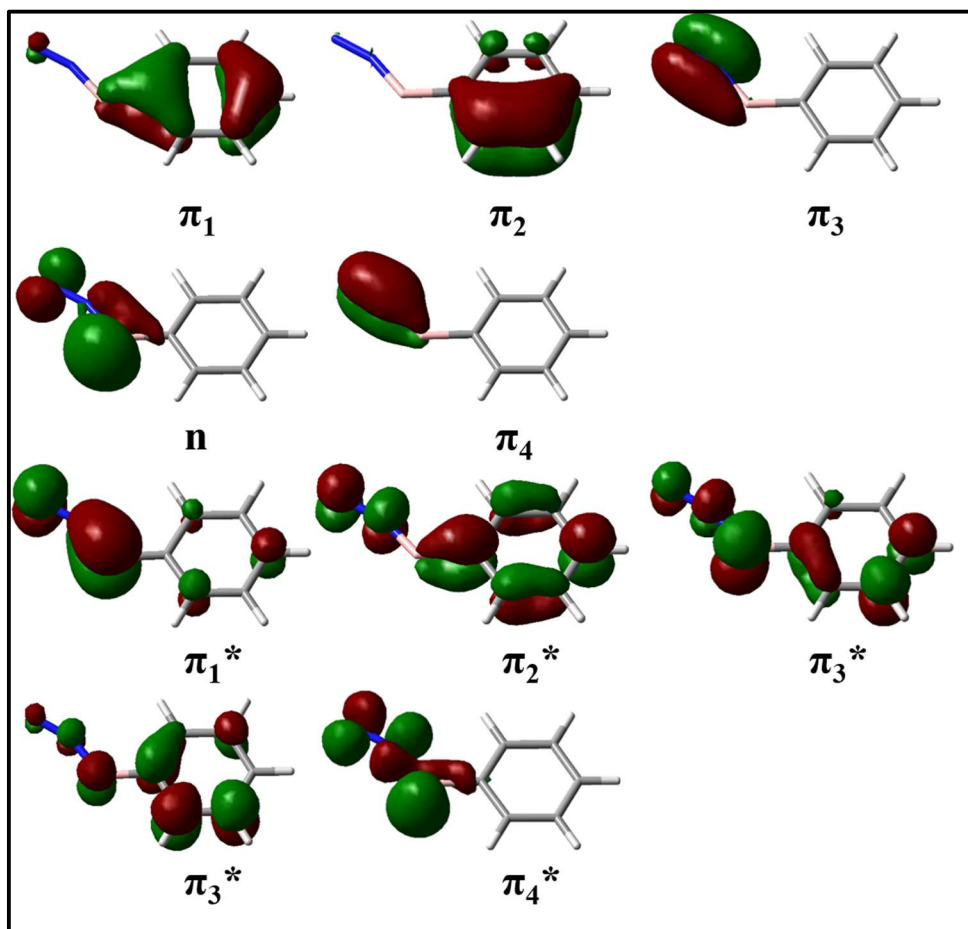

Figure S11. The (10,10) active orbitals of 7 in the CASPT2 calculations.

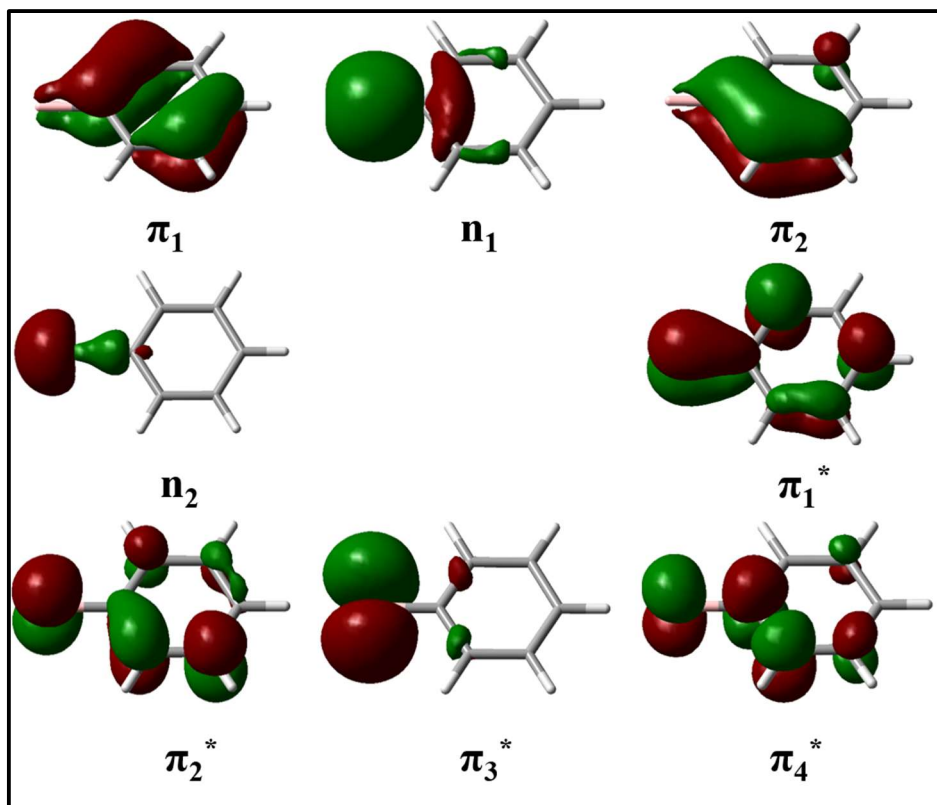

Figure SI2. The (8,8) active orbitals of **8** in the CASPT2 calculations.

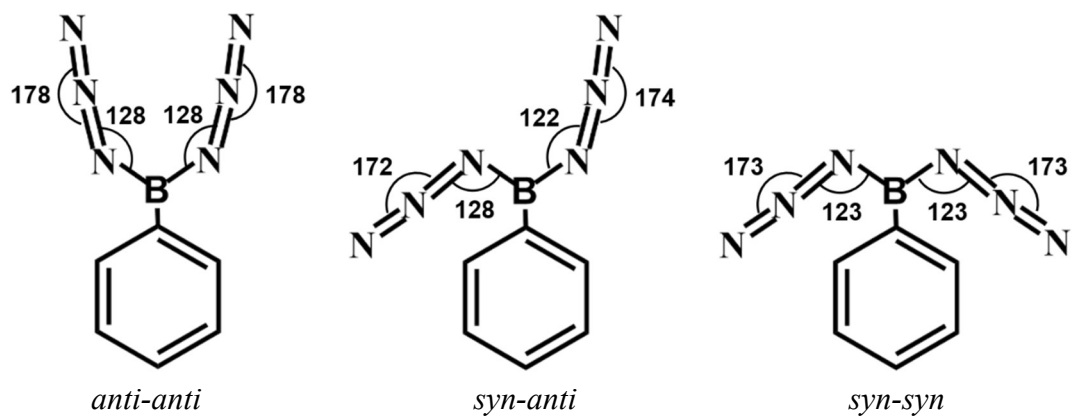

Figure SI3. DFT-optimized ground-state structure of **1**. Angles are given in °.



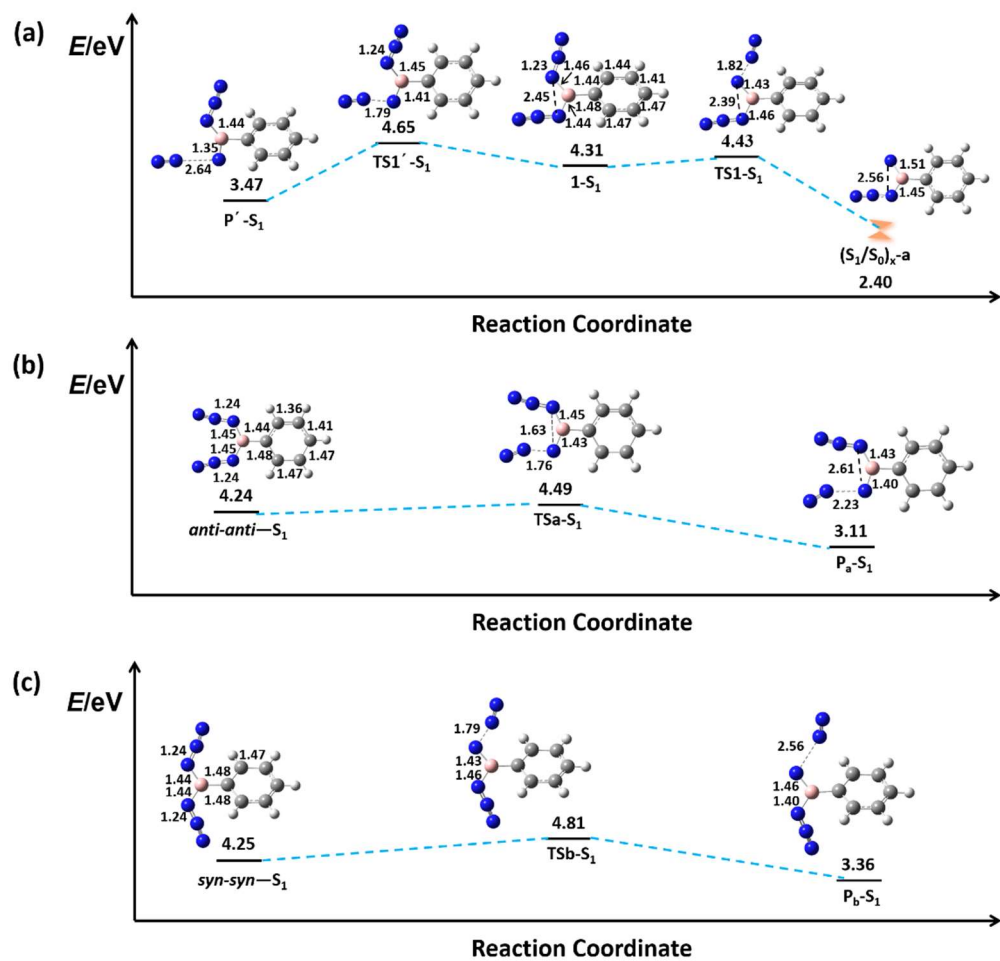

Figure SI4. CASPT2//CASSCF energy profiles with key structures (distance in Å) for the first dinitrogen extrusion from (a) *syn-anti* conformer, (b) *anti-anti* conformer, and (c) *syn-syn* conformer of PhBN<sub>6</sub> in S<sub>1</sub> state.

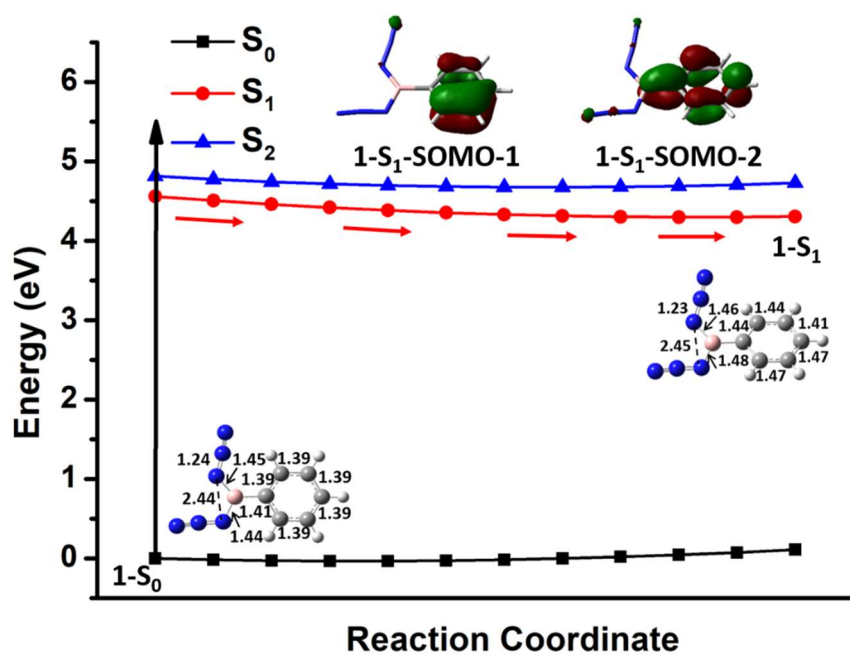

Figure SI5. Energy plot from 1-S<sub>0</sub> to 1-S<sub>1</sub>. Bond lengths are given in Å.

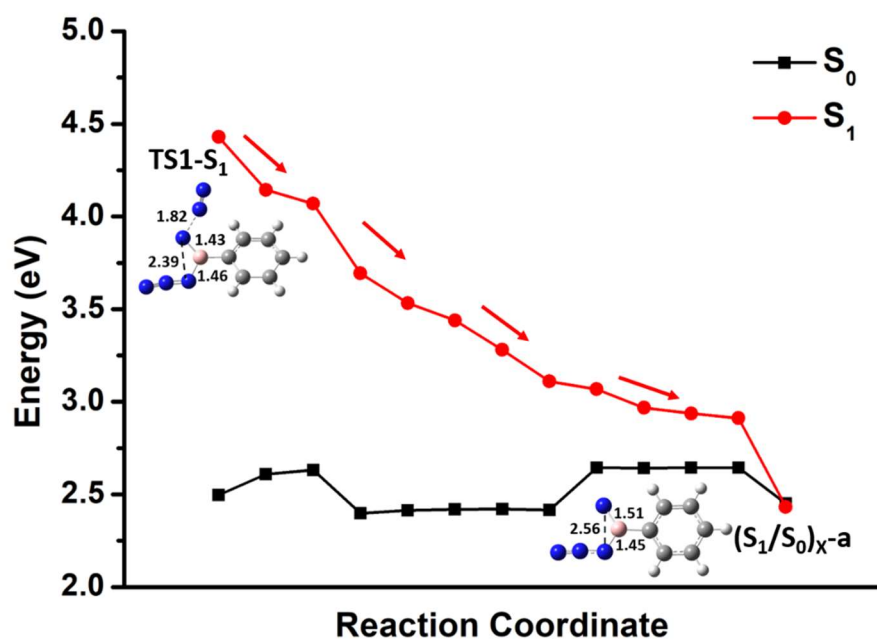

Figure SI6. Energy plot from  $TS1-S_1$  to  $(S_1/S_0)_{x-a}$ . Bond lengths are given in Å.

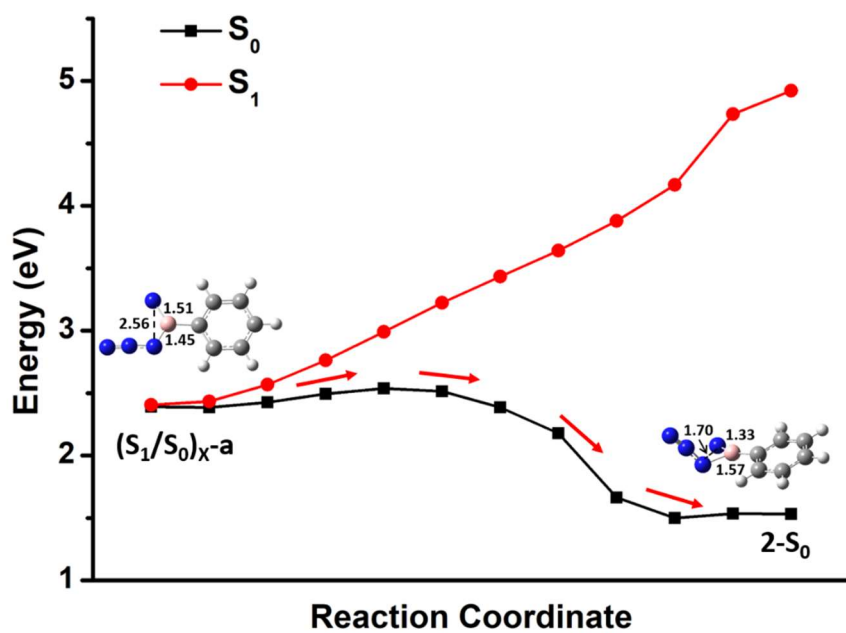

Figure SI7. Energy plot from  $(S_1/S_0)_{x-a}$  to  $2-S_0$ . Bond lengths are given in Å.

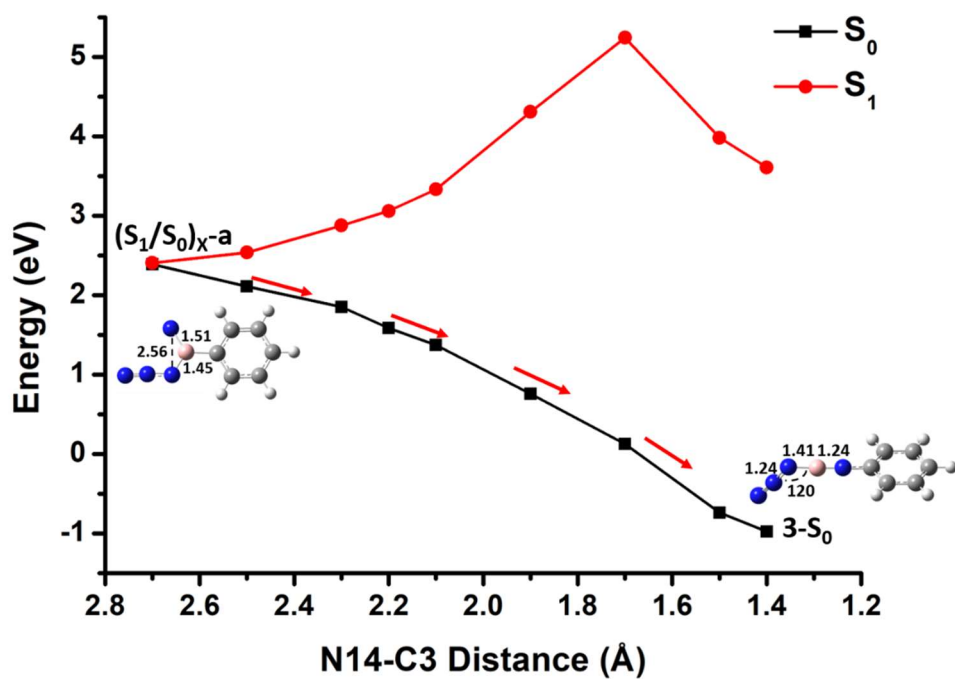

Figure SI8. Energy plot along the shorten C-N distance from  $(S_1/S_0)_{x-a}$ . Bond lengths are given in Å and angles are in °.

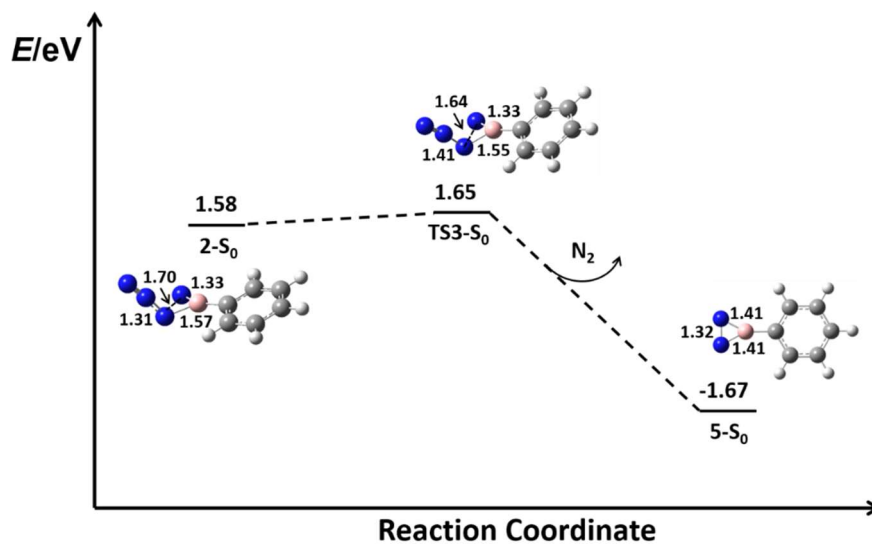

Figure SI9. CASPT2//CASSCF energy profiles for the dinitrogen extrusion reaction of  $2-S_0$  to the diazirine derivative  $5-S_0$ . Distances are given in Å.

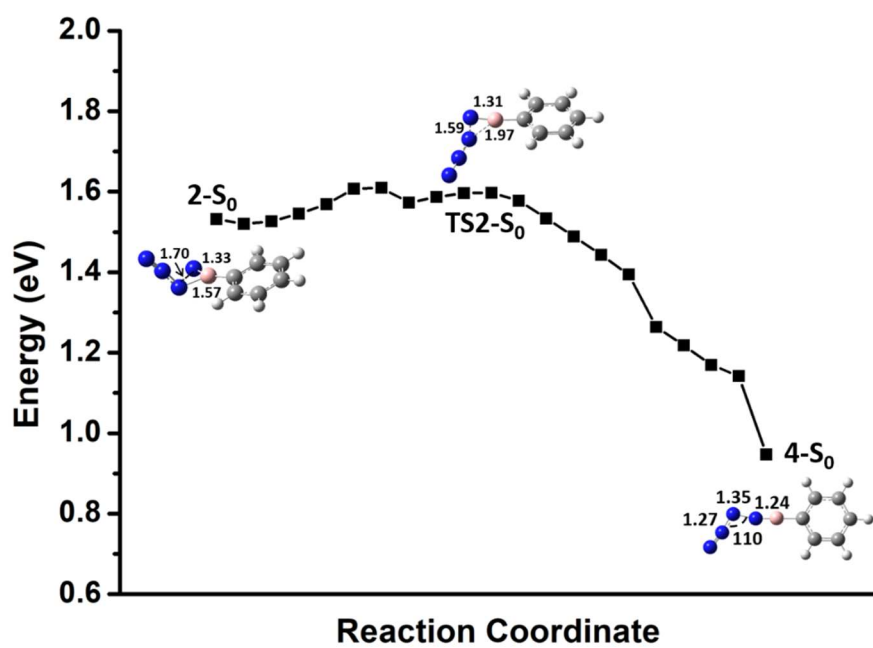

Figure SI10. Energy plot from 2-S<sub>0</sub> to 4-S<sub>0</sub> via TS2-S<sub>0</sub>. Bond lengths are given in Å and angles are in °.

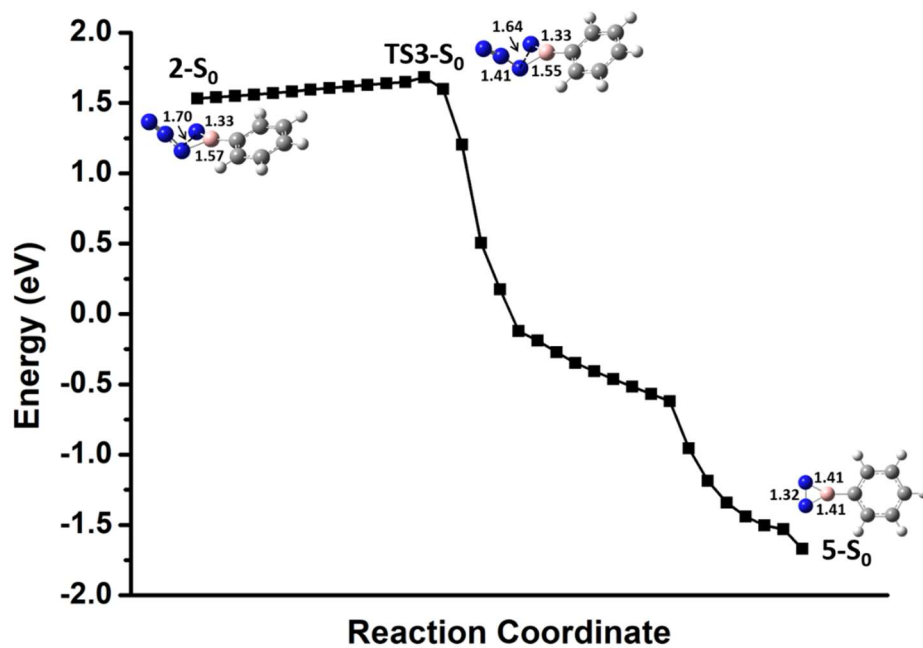

Figure SI11. Energy plot from 2-S<sub>0</sub> to 5-S<sub>0</sub> via TS3-S<sub>0</sub>. Bond lengths are given in Å.



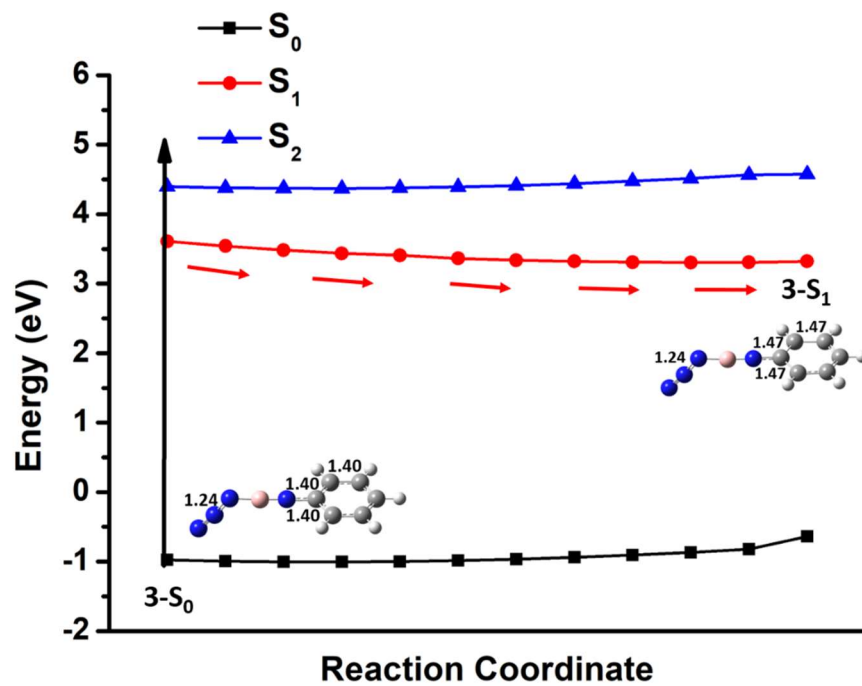

Figure SI12. Energy plot from 3- $S_0$  to 3- $S_1$ . Bond lengths are given in Å.

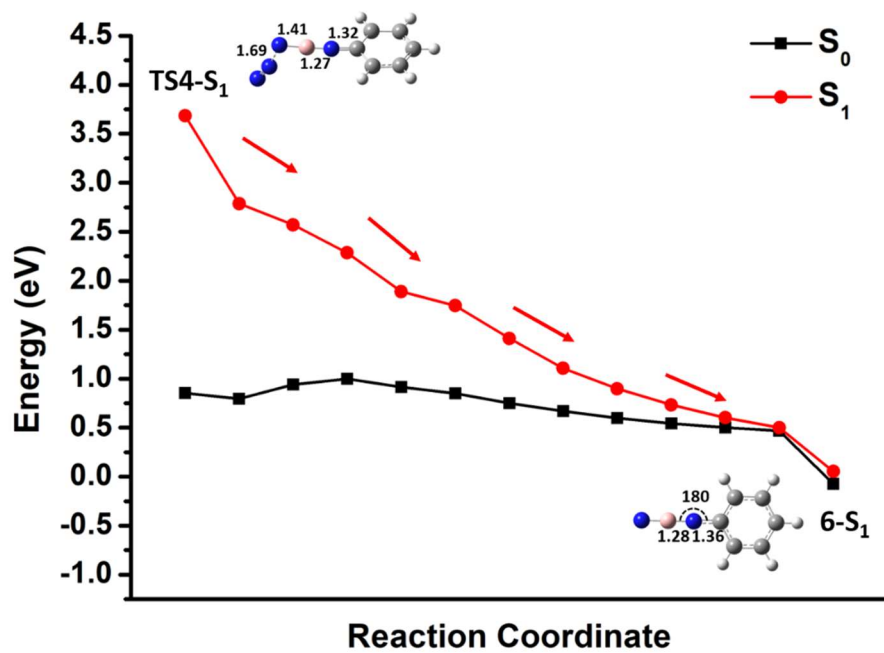

Figure SI13. Energy plot from  $TS4-S_1$  to  $6-S_1$ . Bond lengths are given in Å and angles are in °.

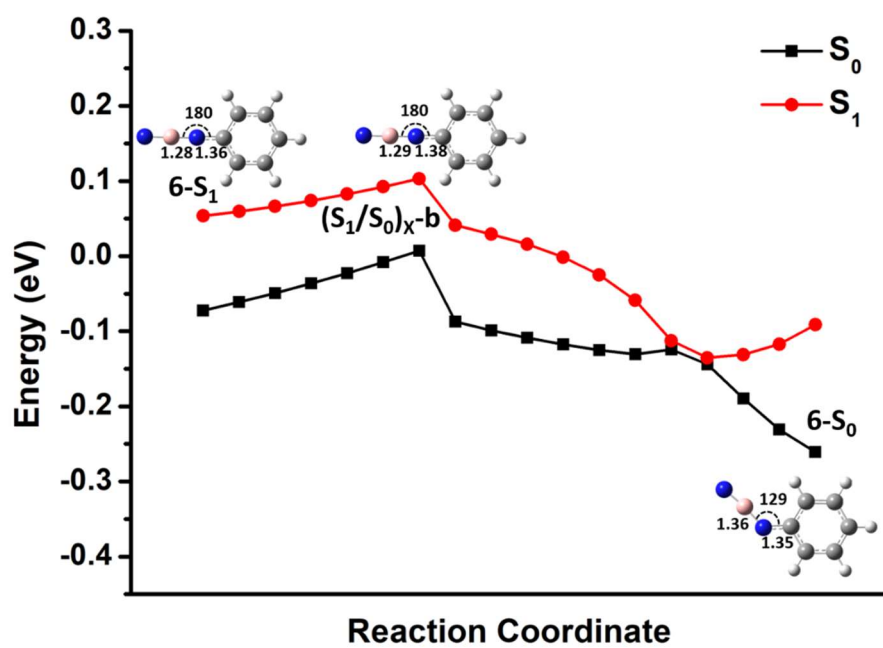

Figure SI14. Energy plot from to **6-S<sub>1</sub>** and **6-S<sub>0</sub>** via (S<sub>1</sub>/S<sub>0</sub>)<sub>X-b</sub>. Bond lengths are given in Å and angles are in °.

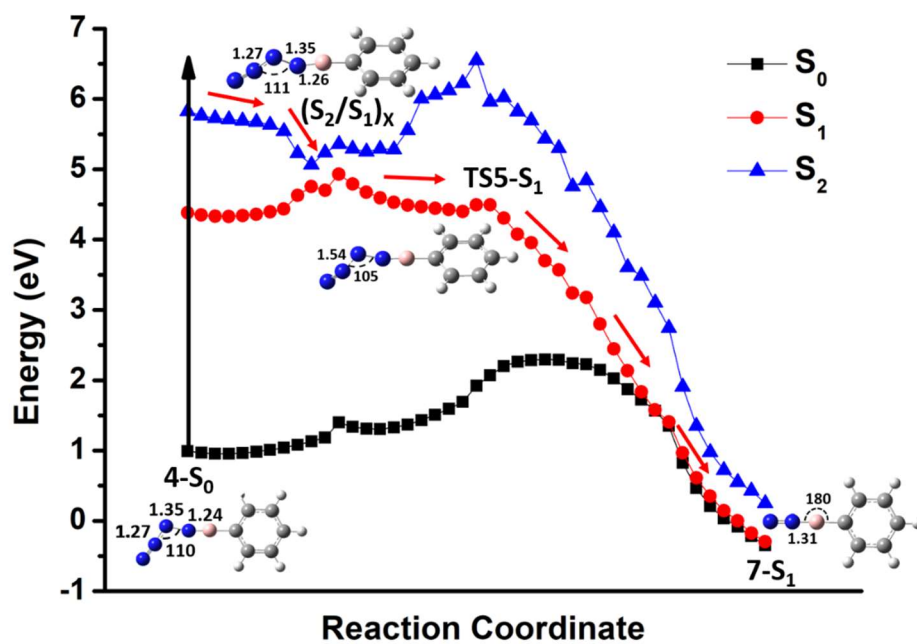

Figure SI15. Energy plot from 4- $S_0$  to 7- $S_1$  via  $(S_2/S_1)_X$  and  $TS5-S_1$ . Bond lengths are given in Å.

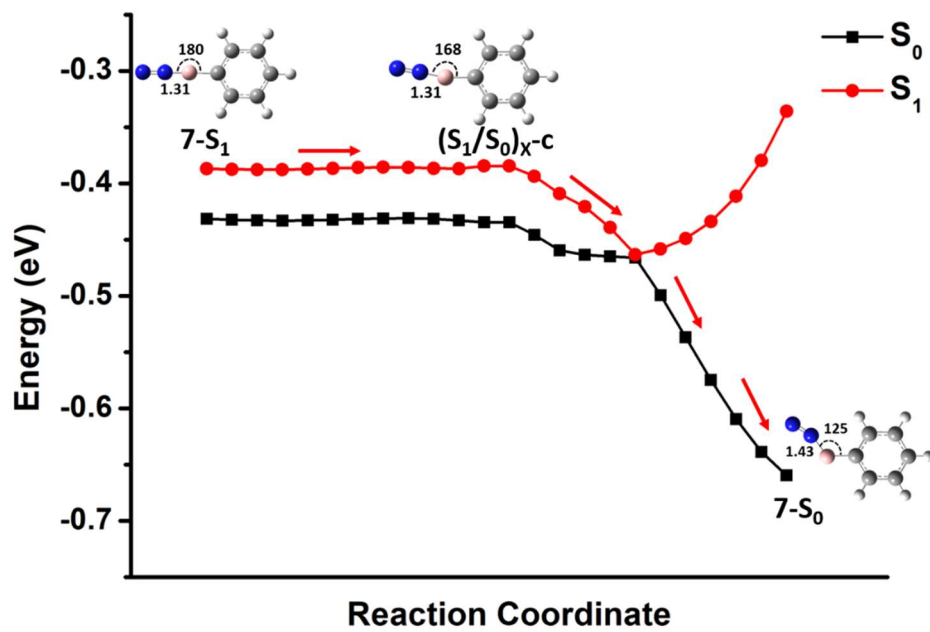

Figure SI16. Energy plot from 7-S<sub>1</sub> to 7-S<sub>0</sub>. Bond lengths are given in Å and angles are in °.

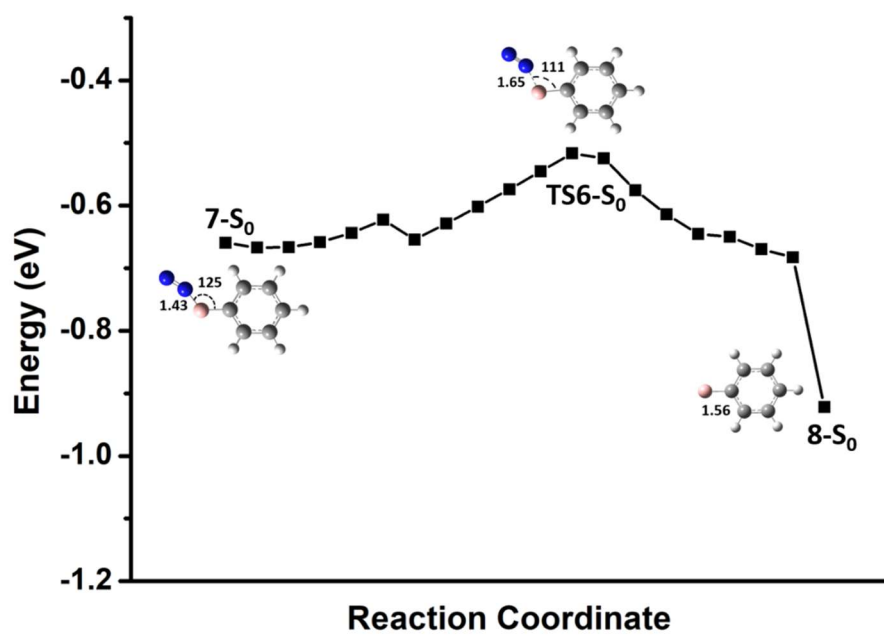

Figure SI17. Energy plot from 7-S<sub>0</sub> to 8-S<sub>0</sub> via TS6-S<sub>0</sub>. Bond lengths are given in Å and angles are in °.

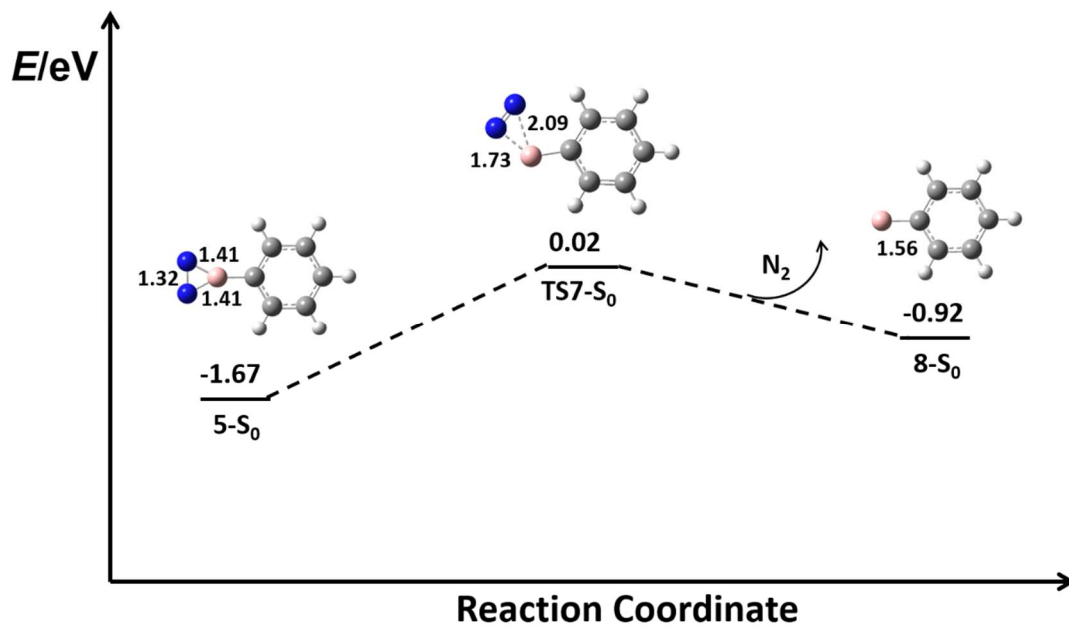

Figure SI18. CASPT2//CASSCF energy profiles for the dinitrogen extrusion reaction of  $5-S_0$  to  $8-S_0$ . Distances are given in Å.

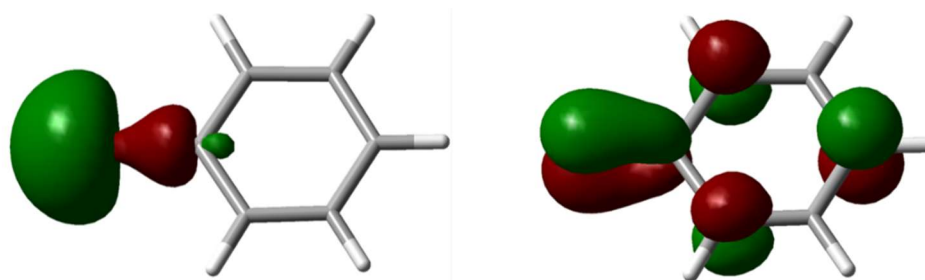

Figure SI19. The key molecular orbitals of **8**. For  $S_0$  state, the left orbital is the HOMO orbital and the right is the LUMO orbital. For  $T_1$  and  $S_1$  states, these two orbitals are singly occupied.



### Cartesian coordinates of optimized structure by CASSCF and DFT

| 1-S <sub>0</sub> (CASSCF)   |           |           |           | 1-S <sub>1</sub> (CASSCF)   |           |           |           |
|-----------------------------|-----------|-----------|-----------|-----------------------------|-----------|-----------|-----------|
| C                           | 2.934360  | 0.821643  | 0.007995  | C                           | 2.953876  | 0.843230  | -0.265151 |
| C                           | 1.550094  | 0.918741  | 0.007757  | C                           | 1.522043  | 0.940273  | -0.302249 |
| C                           | 0.734144  | -0.210466 | 0.000423  | C                           | 0.672606  | -0.210983 | -0.061489 |
| C                           | 1.369154  | -1.466512 | -0.006697 | C                           | 1.353105  | -1.468244 | 0.185875  |
| C                           | 2.754676  | -1.576414 | -0.006649 | C                           | 2.784494  | -1.559079 | 0.232400  |
| C                           | 3.544693  | -0.427898 | 0.000737  | C                           | 3.592929  | -0.402690 | 0.012618  |
| H                           | 3.532681  | 1.715275  | 0.013981  | H                           | 3.543335  | 1.720430  | -0.453238 |
| H                           | 1.126095  | 1.904806  | 0.014119  | H                           | 1.092639  | 1.889859  | -0.554968 |
| H                           | 0.768666  | -2.355940 | -0.011983 | H                           | 0.767713  | -2.352318 | 0.340189  |
| H                           | 3.215826  | -2.548081 | -0.012058 | H                           | 3.245080  | -2.508136 | 0.429994  |
| H                           | 4.617326  | -0.506238 | 0.001001  | H                           | 4.662015  | -0.469425 | 0.045497  |
| B                           | -0.841985 | -0.167645 | 0.000891  | B                           | -0.882709 | -0.172465 | -0.088595 |
| N                           | -1.513966 | -1.441553 | 0.006254  | N                           | -1.565730 | -1.422375 | -0.288986 |
| N                           | -1.715554 | 0.986976  | -0.004227 | N                           | -1.732514 | 0.999764  | 0.069219  |
| N                           | -2.765276 | -1.423569 | 0.008141  | N                           | -2.818223 | -1.394279 | -0.273731 |
| N                           | -1.329695 | 2.163172  | -0.011430 | N                           | -1.283834 | 2.082737  | 0.451999  |
| N                           | -3.874551 | -1.525606 | 0.010288  | N                           | -3.928087 | -1.488004 | -0.279106 |
| N                           | -1.135080 | 3.263550  | -0.017931 | N                           | -1.007130 | 3.095947  | 0.800337  |
| TS1-S <sub>0</sub> (CASSCF) |           |           |           | TS1-S <sub>1</sub> (CASSCF) |           |           |           |
| C                           | 2.837780  | 0.775949  | -0.544686 | C                           | 2.855995  | 0.814590  | -0.418873 |
| C                           | 1.460146  | 0.836876  | -0.579222 | C                           | 1.495603  | 0.877387  | -0.465747 |
| C                           | 0.669911  | -0.215741 | -0.101069 | C                           | 0.634939  | -0.213077 | -0.091941 |
| C                           | 1.323884  | -1.346051 | 0.407006  | C                           | 1.309781  | -1.470104 | 0.308690  |
| C                           | 2.715202  | -1.406473 | 0.462154  | C                           | 2.776367  | -1.527093 | 0.383635  |
| C                           | 3.475777  | -0.343400 | -0.014986 | C                           | 3.551266  | -0.337040 | 0.011222  |
| H                           | 3.420781  | 1.593883  | -0.929732 | H                           | 3.426389  | 1.674130  | -0.726134 |
| H                           | 0.990899  | 1.707182  | -1.004792 | H                           | 1.047874  | 1.782937  | -0.833141 |
| H                           | 0.744060  | -2.181074 | 0.756627  | H                           | 0.728647  | -2.340075 | 0.530589  |
| H                           | 3.199419  | -2.277939 | 0.865652  | H                           | 3.267068  | -2.428364 | 0.690717  |
| H                           | 4.549751  | -0.387494 | 0.017797  | H                           | 4.621276  | -0.354251 | 0.050369  |
| B                           | -0.901408 | -0.189032 | -0.156966 | B                           | -0.914722 | -0.169338 | -0.158779 |
| N                           | -1.569297 | -1.396573 | -0.617573 | N                           | -1.593520 | -1.418882 | -0.489667 |
| N                           | -1.816026 | 0.849758  | 0.168431  | N                           | -1.842728 | 0.898704  | 0.026370  |
| N                           | -2.814322 | -1.481129 | -0.580792 | N                           | -2.835296 | -1.499328 | -0.422223 |
| N                           | -0.836426 | 2.183339  | 0.949976  | N                           | -0.919527 | 2.295569  | 0.748906  |
| N                           | -3.910168 | -1.693105 | -0.601458 | N                           | -3.932083 | -1.709272 | -0.400746 |
| N                           | -0.568353 | 3.095263  | 1.504246  | N                           | -0.705719 | 3.247750  | 1.257363  |

| <b>TS1' -S<sub>1</sub>(CASSCF)</b>            |           |           |           | <b>P' -S<sub>1</sub>(CASSCF)</b> |           |           |           |
|-----------------------------------------------|-----------|-----------|-----------|----------------------------------|-----------|-----------|-----------|
| C                                             | 0.000037  | -0.562649 | -0.030152 | C                                | 0.023422  | -0.607265 | -0.083733 |
| C                                             | 0.039895  | -0.605029 | 1.404615  | C                                | 0.080320  | -0.670870 | 1.352157  |
| C                                             | 1.170924  | -0.082843 | 2.143566  | C                                | 1.177138  | -0.077994 | 2.087594  |
| C                                             | 2.267485  | 0.465988  | 1.372666  | C                                | 2.237013  | 0.531679  | 1.310864  |
| C                                             | 2.222822  | 0.513679  | -0.060155 | C                                | 2.194332  | 0.551416  | -0.119545 |
| C                                             | 1.088719  | 0.001549  | -0.767204 | C                                | 1.084002  | -0.006141 | -0.824227 |
| H                                             | -0.852062 | -0.959909 | -0.547381 | H                                | -0.821846 | -1.030486 | -0.595460 |
| H                                             | -0.780428 | -1.057710 | 1.929486  | H                                | -0.723108 | -1.165174 | 1.886505  |
| H                                             | 3.128616  | 0.849771  | 1.883557  | H                                | 3.080039  | 0.959383  | 1.823074  |
| H                                             | 3.048177  | 0.934731  | -0.601090 | H                                | 3.003484  | 0.999665  | -0.660389 |
| H                                             | 1.056431  | 0.035882  | -1.838085 | H                                | 1.048902  | 0.023573  | -1.893881 |
| B                                             | 1.213012  | -0.144482 | 3.714562  | B                                | 1.147471  | -0.119591 | 3.677698  |
| N                                             | 2.443789  | -0.662436 | 4.165599  | N                                | 2.291048  | -0.827636 | 3.787631  |
| N                                             | 0.135655  | 0.241972  | 4.610894  | N                                | 0.156512  | 0.339470  | 4.615901  |
| N                                             | 2.336629  | -0.551389 | 5.948344  | N                                | 2.451677  | -0.672549 | 6.418787  |
| N                                             | -0.846659 | 0.821393  | 4.129189  | N                                | -0.827203 | 0.933699  | 4.153104  |
| N                                             | 2.501728  | -0.596149 | 7.034762  | N                                | 2.551024  | -0.642416 | 7.515104  |
| N                                             | -1.768663 | 1.343973  | 3.813341  | N                                | -1.748121 | 1.467578  | 3.855331  |
| <b><i>anti-anti</i>-S<sub>1</sub>(CASSCF)</b> |           |           |           | <b>TSa-S<sub>1</sub>(CASSCF)</b> |           |           |           |
| C                                             | 3.115967  | 1.213121  | -0.000841 | C                                | -0.008161 | 0.026675  | 0.045899  |
| C                                             | 1.751538  | 1.193654  | 0.001979  | C                                | 0.021656  | 0.007474  | 1.407526  |
| C                                             | 0.971180  | -0.017115 | 0.003186  | C                                | 1.238172  | -0.021613 | 2.175080  |
| C                                             | 1.733352  | -1.280806 | 0.002709  | C                                | 2.502507  | -0.039499 | 1.405537  |
| C                                             | 3.202940  | -1.254334 | -0.000443 | C                                | 2.465953  | -0.015038 | -0.064670 |
| C                                             | 3.893404  | 0.038875  | -0.002472 | C                                | 1.164934  | 0.020387  | -0.742715 |
| H                                             | 3.620607  | 2.164124  | -0.002042 | H                                | -0.961934 | 0.048109  | -0.452480 |
| H                                             | 1.222550  | 2.128515  | 0.002884  | H                                | -0.908085 | 0.013463  | 1.944937  |
| H                                             | 1.217837  | -2.218046 | 0.004263  | H                                | 3.446607  | -0.082412 | 1.907675  |
| H                                             | 3.757389  | -2.171926 | -0.001446 | H                                | 3.378274  | -0.028146 | -0.626526 |
| H                                             | 4.963393  | 0.080389  | -0.005174 | H                                | 1.114067  | 0.040353  | -1.812219 |
| B                                             | -0.566213 | 0.002538  | 0.002922  | B                                | 1.197951  | -0.013528 | 3.731258  |
| N                                             | -1.229012 | -1.289627 | 0.002301  | N                                | 2.509892  | 0.153240  | 4.268344  |
| N                                             | -1.204520 | 1.306569  | 0.003005  | N                                | -0.102954 | -0.154799 | 4.357082  |
| N                                             | -2.458826 | -1.428896 | -0.001859 | N                                | 2.463441  | 0.032578  | 6.027330  |
| N                                             | -2.430727 | 1.470115  | -0.000338 | N                                | -0.295670 | -0.033076 | 5.569023  |
| N                                             | -3.544521 | -1.701153 | -0.005621 | N                                | 2.854519  | -0.006028 | 7.055591  |
| N                                             | -3.510917 | 1.763912  | -0.003331 | N                                | -0.608552 | 0.057828  | 6.640327  |

| <b>P<sub>a</sub>-S<sub>1</sub>(CASSCF)</b> |           |           |           | <b>syn-syn-S<sub>1</sub>(CASSCF)</b>       |           |           |           |
|--------------------------------------------|-----------|-----------|-----------|--------------------------------------------|-----------|-----------|-----------|
| C                                          | -0.010090 | 0.027117  | 0.040466  | C                                          | -2.468210 | -0.842459 | -0.849781 |
| C                                          | 0.018959  | 0.007903  | 1.401677  | C                                          | -1.048825 | -0.861462 | -0.880241 |
| C                                          | 1.235733  | -0.023014 | 2.166606  | C                                          | -0.235335 | 0.011468  | 0.002869  |
| C                                          | 2.501512  | -0.040855 | 1.399901  | C                                          | -1.021991 | 0.889956  | 0.897705  |
| C                                          | 2.465291  | -0.015198 | -0.069799 | C                                          | -2.494116 | 0.854608  | 0.871691  |
| C                                          | 1.164006  | 0.020558  | -0.747074 | C                                          | -3.165994 | -0.026348 | -0.015891 |
| H                                          | -0.963319 | 0.048804  | -0.458843 | H                                          | -2.997782 | -1.498022 | -1.517752 |
| H                                          | -0.910147 | 0.014149  | 1.940121  | H                                          | -0.555382 | -1.494871 | -1.591389 |
| H                                          | 3.445579  | -0.085524 | 1.901892  | H                                          | -0.529463 | 1.502705  | 1.626123  |
| H                                          | 3.377407  | -0.028223 | -0.631863 | H                                          | -3.045754 | 1.497033  | 1.529506  |
| H                                          | 1.113318  | 0.040660  | -1.816570 | H                                          | -4.240089 | -0.040133 | -0.023702 |
| B                                          | 1.192543  | -0.013622 | 3.721798  | B                                          | 1.325093  | 0.002096  | -0.004798 |
| N                                          | 2.509975  | 0.158813  | 4.228116  | N                                          | 2.138844  | 1.187498  | 0.120566  |
| N                                          | -0.102189 | -0.155319 | 4.355638  | N                                          | 2.125966  | -1.190847 | -0.136204 |
| N                                          | 2.462663  | 0.030786  | 6.074566  | N                                          | 1.609933  | 2.307957  | 0.012718  |
| N                                          | -0.292587 | -0.032934 | 5.568265  | N                                          | 1.587483  | -2.306867 | -0.027316 |
| N                                          | 2.863796  | -0.008004 | 7.097886  | N                                          | 1.265744  | 3.367494  | -0.069295 |
| N                                          | -0.606525 | 0.057769  | 6.639047  | N                                          | 1.235232  | -3.363662 | 0.055100  |
| <b>TSb-S<sub>1</sub>(CASSCF)</b>           |           |           |           | <b>P<sub>b</sub>-S<sub>1</sub>(CASSCF)</b> |           |           |           |
| C                                          | 2.473342  | -0.895270 | 0.792078  | C                                          | 2.462870  | -0.886955 | 0.806025  |
| C                                          | 1.054276  | -0.940662 | 0.813348  | C                                          | 1.045677  | -0.964955 | 0.820866  |
| C                                          | 0.234954  | -0.000994 | 0.006003  | C                                          | 0.208305  | -0.072457 | -0.018760 |
| C                                          | 1.006004  | 0.951030  | -0.823330 | C                                          | 0.956905  | 0.905850  | -0.833462 |
| C                                          | 2.479025  | 0.933922  | -0.792703 | C                                          | 2.429718  | 0.926406  | -0.793620 |
| C                                          | 3.159180  | -0.002245 | 0.029288  | C                                          | 3.131925  | 0.011373  | 0.035149  |
| H                                          | 3.012922  | -1.594556 | 1.405477  | H                                          | 3.014284  | -1.565963 | 1.431730  |
| H                                          | 0.561483  | -1.647670 | 1.451936  | H                                          | 0.565947  | -1.673426 | 1.467751  |
| H                                          | 0.500676  | 1.610317  | -1.500069 | H                                          | 0.435213  | 1.568098  | -1.494309 |
| H                                          | 3.025441  | 1.629700  | -1.398456 | H                                          | 2.960249  | 1.635623  | -1.398902 |
| H                                          | 4.233509  | 0.000423  | 0.041713  | H                                          | 4.205766  | 0.038981  | 0.049899  |
| B                                          | -1.321894 | -0.063975 | 0.022444  | B                                          | -1.334645 | -0.234900 | -0.037555 |
| N                                          | -2.270735 | 1.000804  | 0.065474  | N                                          | -2.279370 | 0.798945  | -0.138828 |
| N                                          | -2.081040 | -1.307958 | -0.017235 | N                                          | -2.062641 | -1.498297 | 0.037451  |
| N                                          | -1.321864 | 2.465621  | 0.462677  | N                                          | -1.085321 | 2.962813  | 0.540746  |
| N                                          | -1.535979 | -2.324139 | -0.473520 | N                                          | -1.529673 | -2.486852 | -0.496630 |
| N                                          | -1.058465 | 3.487564  | 0.774350  | N                                          | -0.978749 | 3.970599  | 0.971968  |
| N                                          | -1.152201 | -3.300601 | -0.859499 | N                                          | -1.147825 | -3.433571 | -0.949543 |

| $(S_1/S_0)_{X-a}(\text{CASSCF})$ |           |           |           | $2\text{-}S_0(\text{CASSCF})$ |           |           |           |
|----------------------------------|-----------|-----------|-----------|-------------------------------|-----------|-----------|-----------|
| C                                | 3.386586  | -0.359922 | -0.008939 | C                             | 3.331999  | -0.306131 | -0.261787 |
| C                                | 2.503712  | -1.438184 | -0.023514 | C                             | 2.697552  | -1.374390 | 0.371776  |
| C                                | 1.124583  | -1.222623 | -0.015046 | C                             | 1.355646  | -1.302679 | 0.674407  |
| C                                | 0.619753  | 0.074718  | 0.020794  | C                             | 0.602097  | -0.164185 | 0.355396  |
| C                                | 1.543628  | 1.141986  | 0.034294  | C                             | 1.247788  | 0.903423  | -0.280162 |
| C                                | 2.892570  | 0.947506  | 0.015246  | C                             | 2.605930  | 0.835143  | -0.587136 |
| B                                | -0.917855 | 0.423774  | 0.006803  | B                             | -0.905105 | -0.095516 | 0.697813  |
| N                                | -1.841346 | -0.675890 | 0.204804  | N                             | -2.026524 | 0.966061  | 0.411028  |
| N                                | -3.058833 | -0.365642 | 0.036808  | N                             | -2.684223 | 0.740636  | -0.702870 |
| N                                | -4.156393 | -0.208936 | -0.077416 | N                             | -3.322803 | 0.654558  | -1.602826 |
| N                                | -1.445246 | 1.822128  | -0.172055 | N                             | -2.041891 | -0.527794 | 1.230464  |
| H                                | 2.888336  | -2.442097 | -0.044833 | H                             | 3.258559  | -2.256298 | 0.625163  |
| H                                | 0.452857  | -2.061246 | -0.029974 | H                             | 0.878673  | -2.133336 | 1.164314  |
| H                                | 1.156609  | 2.147245  | 0.047885  | H                             | 0.694032  | 1.792455  | -0.526470 |
| H                                | 3.565432  | 1.785917  | 0.024058  | H                             | 3.090426  | 1.663423  | -1.072629 |
| H                                | 4.447501  | -0.538123 | -0.018919 | H                             | 4.379740  | -0.364760 | -0.496480 |
| $3\text{-}S_0(\text{CASSCF})$    |           |           |           | $3\text{-}S_1(\text{CASSCF})$ |           |           |           |
| C                                | 3.620123  | -0.330869 | 0.161280  | C                             | 3.640506  | -0.318675 | 0.151042  |
| C                                | 2.788031  | -1.234820 | 0.817419  | C                             | 2.835273  | -1.262517 | 0.840303  |
| C                                | 1.408689  | -1.151664 | 0.669117  | C                             | 1.369918  | -1.201542 | 0.705294  |
| C                                | 0.850834  | -0.156731 | -0.141294 | C                             | 0.795774  | -0.156134 | -0.147662 |
| C                                | 1.691624  | 0.744857  | -0.794785 | C                             | 1.701865  | 0.781878  | -0.827786 |
| C                                | 3.070778  | 0.649790  | -0.638045 | C                             | 3.104961  | 0.651389  | -0.640985 |
| B                                | -1.748566 | 0.016891  | -0.422927 | B                             | -1.776553 | 0.037445  | -0.421841 |
| N                                | -3.143602 | 0.065380  | -0.641589 | N                             | -3.171255 | 0.069657  | -0.636772 |
| N                                | -3.864125 | 0.684063  | 0.159463  | N                             | -3.899290 | 0.686501  | 0.160878  |
| N                                | -4.619881 | 1.201087  | 0.797738  | N                             | -4.662237 | 1.197958  | 0.794542  |
| N                                | -0.517780 | -0.068553 | -0.291127 | N                             | -0.535922 | -0.053106 | -0.301311 |
| H                                | 3.210529  | -2.001833 | 1.441368  | H                             | 3.281332  | -2.017176 | 1.455464  |
| H                                | 0.758562  | -1.845289 | 1.169806  | H                             | 0.727112  | -1.896954 | 1.203182  |
| H                                | 1.260820  | 1.507179  | -1.417273 | H                             | 1.285990  | 1.545122  | -1.453630 |
| H                                | 3.708935  | 1.349966  | -1.147256 | H                             | 3.755528  | 1.344455  | -1.143187 |
| H                                | 4.686922  | -0.398840 | 0.278107  | H                             | 4.708892  | -0.377688 | 0.262471  |

| TS2-S <sub>0</sub> (CASSCF) |           |           |           | 4-S <sub>0</sub> (CASSCF)   |           |           |           |
|-----------------------------|-----------|-----------|-----------|-----------------------------|-----------|-----------|-----------|
| C                           | 3.404417  | -0.419582 | -0.235307 | C                           | 3.531441  | -0.401406 | -0.027349 |
| C                           | 2.532530  | -1.453128 | 0.104753  | C                           | 2.719706  | -1.503021 | 0.225387  |
| C                           | 1.214193  | -1.176389 | 0.395982  | C                           | 1.335026  | -1.384193 | 0.124201  |
| C                           | 0.730629  | 0.138066  | 0.357526  | C                           | 0.746632  | -0.163062 | -0.230588 |
| C                           | 1.614377  | 1.173221  | 0.016667  | C                           | 1.584696  | 0.932614  | -0.480150 |
| C                           | 2.945711  | 0.894516  | -0.279799 | C                           | 2.954160  | 0.816338  | -0.380537 |
| B                           | -0.732427 | 0.446735  | 0.683671  | B                           | -0.784024 | -0.031825 | -0.342648 |
| N                           | -2.285244 | 0.805082  | -0.469340 | N                           | -3.358779 | -0.014124 | -0.472453 |
| N                           | -3.144206 | -0.107500 | -0.615089 | N                           | -3.882538 | 1.089051  | -0.808721 |
| N                           | -3.937217 | -0.868148 | -0.815587 | N                           | -4.484612 | 1.986591  | -1.091136 |
| N                           | -1.929584 | 0.803459  | 1.081305  | N                           | -2.010610 | 0.107805  | -0.442601 |
| H                           | 2.889228  | -2.466711 | 0.139296  | H                           | 3.158290  | -2.446013 | 0.498552  |
| H                           | 0.549926  | -1.980296 | 0.658606  | H                           | 0.714570  | -2.240203 | 0.320942  |
| H                           | 1.260615  | 2.187501  | -0.017869 | H                           | 1.154626  | 1.879847  | -0.753914 |
| H                           | 3.616820  | 1.692206  | -0.541913 | H                           | 3.579368  | 1.669256  | -0.576305 |
| H                           | 4.432129  | -0.638422 | -0.462901 | H                           | 4.600358  | -0.488774 | 0.049526  |
| TS3-S <sub>0</sub> (CASSCF) |           |           |           | TS4-S <sub>0</sub> (CASSCF) |           |           |           |
| C                           | 3.326289  | -0.312869 | -0.276940 | C                           | 3.622732  | -0.282846 | 0.202347  |
| C                           | 2.687424  | -1.380096 | 0.354053  | C                           | 2.801642  | -1.234809 | 0.858480  |
| C                           | 1.349516  | -1.295617 | 0.673927  | C                           | 1.343572  | -1.202110 | 0.667749  |
| C                           | 0.605481  | -0.146495 | 0.375960  | C                           | 0.765992  | -0.174445 | -0.204138 |
| C                           | 1.255912  | 0.919984  | -0.257355 | C                           | 1.696369  | 0.774763  | -0.845807 |
| C                           | 2.608990  | 0.839708  | -0.582298 | C                           | 3.095588  | 0.673982  | -0.609595 |
| B                           | -0.897834 | -0.063023 | 0.736322  | B                           | -1.786831 | -0.118239 | -0.617086 |
| N                           | -2.042601 | 0.943265  | 0.465354  | N                           | -3.175153 | -0.175176 | -0.843460 |
| N                           | -2.673962 | 0.692819  | -0.767143 | N                           | -3.825294 | 0.813205  | 0.370771  |
| N                           | -3.305018 | 0.611163  | -1.668076 | N                           | -4.503614 | 1.374956  | 1.031128  |
| N                           | -2.038366 | -0.485833 | 1.272141  | N                           | -0.534256 | -0.104295 | -0.416425 |
| H                           | 3.241185  | -2.270980 | 0.591578  | H                           | 3.233497  | -1.983446 | 1.493045  |
| H                           | 0.868451  | -2.125579 | 1.160975  | H                           | 0.701170  | -1.914474 | 1.143415  |
| H                           | 0.709130  | 1.817725  | -0.487880 | H                           | 1.293082  | 1.529582  | -1.491414 |
| H                           | 3.096926  | 1.667387  | -1.065477 | H                           | 3.747105  | 1.379545  | -1.093242 |
| H                           | 4.370372  | -0.380949 | -0.525139 | H                           | 4.686291  | -0.32558  | 0.354233  |

| 5-S <sub>0</sub> (CASSCF) |           |           |           | 6-S <sub>0</sub> (CASSCF) |           |           |           |
|---------------------------|-----------|-----------|-----------|---------------------------|-----------|-----------|-----------|
| C                         | -1.882643 | -1.211933 | -0.000018 | C                         | -2.183965 | -0.901305 | 0.000303  |
| C                         | -0.488641 | -1.210599 | 0.000006  | C                         | -0.856721 | -1.306837 | 0.000036  |
| C                         | 0.228866  | -0.000850 | 0.000027  | C                         | 0.189746  | -0.348435 | -0.000279 |
| C                         | -0.488536 | 1.208713  | 0.000036  | C                         | -0.149248 | 1.034105  | -0.000378 |
| C                         | -1.882122 | 1.207702  | 0.000026  | C                         | -1.477453 | 1.425880  | -0.000044 |
| C                         | -2.579460 | -0.001703 | -0.000007 | C                         | -2.499875 | 0.463056  | 0.000493  |
| H                         | -2.419662 | -2.143162 | -0.000051 | H                         | -2.969361 | -1.634524 | 0.000499  |
| H                         | 0.044447  | -2.144527 | -0.000007 | H                         | -0.588116 | -2.346177 | -0.000187 |
| H                         | 0.043899  | 2.142982  | 0.000043  | H                         | 0.638248  | 1.765388  | -0.000798 |
| H                         | -2.430849 | 2.158035  | 0.000032  | H                         | -1.726563 | 2.471107  | -0.000167 |
| H                         | -3.654646 | -0.001594 | -0.000028 | H                         | -3.527903 | 0.775718  | 0.000758  |
| B                         | 1.764982  | -0.000975 | 0.000009  | N                         | 1.455755  | -0.804351 | -0.000216 |
| N                         | 3.007098  | 0.658258  | -0.000115 | B                         | 2.625179  | -0.101400 | 0.000329  |
| N                         | 3.007036  | -0.660321 | 0.000048  | N                         | 3.832140  | 0.406404  | 0.000570  |
| 6-S <sub>1</sub> (CASSCF) |           |           |           | 6-T <sub>1</sub> (CASSCF) |           |           |           |
| C                         | -2.084332 | -0.911878 | 0.000916  | C                         | -2.081211 | -0.910268 | 0.000273  |
| C                         | -0.712119 | -1.138521 | 0.001830  | C                         | -0.713748 | -1.139248 | 0.000254  |
| C                         | 0.177547  | -0.047712 | -0.000343 | C                         | 0.185795  | -0.048481 | 0.000093  |
| C                         | -0.325944 | 1.266787  | 0.001471  | C                         | -0.327460 | 1.268812  | -0.000100 |
| C                         | -1.700131 | 1.481098  | 0.000429  | C                         | -1.697953 | 1.478935  | -0.000081 |
| C                         | -2.581811 | 0.395322  | -0.000519 | C                         | -2.580835 | 0.395214  | 0.000115  |
| H                         | -2.761828 | -1.745831 | -0.000039 | H                         | -2.764340 | -1.751797 | 0.000407  |
| H                         | -0.313101 | -2.135596 | 0.000912  | H                         | -0.312304 | -2.145104 | 0.000371  |
| H                         | 0.365146  | 2.088839  | 0.001048  | H                         | 0.368325  | 2.098749  | -0.000260 |
| H                         | -2.082519 | 2.485220  | -0.000220 | H                         | -2.083733 | 2.491858  | -0.000219 |
| H                         | -3.642872 | 0.565677  | -0.001965 | H                         | -3.650717 | 0.566942  | 0.000122  |
| N                         | 1.515544  | -0.262574 | -0.000708 | N                         | 1.516001  | -0.261971 | 0.000034  |
| B                         | 2.793621  | -0.466005 | -0.000865 | B                         | 2.779310  | -0.464716 | -0.000023 |
| N                         | 4.114663  | -0.676196 | -0.001028 | N                         | 4.124734  | -0.680297 | -0.000071 |

| $(S_2/S_1)_X(\text{CASSCF})$  |           |           |           | $\text{TS5-S}_1(\text{CASSCF})$ |           |           |           |
|-------------------------------|-----------|-----------|-----------|---------------------------------|-----------|-----------|-----------|
| C                             | 3.593956  | -0.556038 | 0.009235  | C                               | 3.598888  | -0.490857 | -0.144090 |
| C                             | 2.599067  | -1.558143 | 0.168689  | C                               | 2.690775  | -1.624055 | 0.068218  |
| C                             | 1.277287  | -1.295395 | 0.021803  | C                               | 1.241339  | -1.379399 | 0.084822  |
| C                             | 0.749527  | 0.013345  | -0.314748 | C                               | 0.727338  | -0.005131 | -0.111751 |
| C                             | 1.743924  | 1.093989  | -0.493170 | C                               | 1.708346  | 1.031429  | -0.309907 |
| C                             | 3.169735  | 0.808941  | -0.328757 | C                               | 3.050232  | 0.796369  | -0.323780 |
| B                             | -0.738440 | 0.251169  | -0.438841 | B                               | -0.759954 | 0.292152  | -0.105642 |
| N                             | -3.115835 | 0.785428  | 0.049897  | N                               | -3.236969 | 0.826245  | 0.211571  |
| N                             | -4.096374 | 0.766879  | -0.764505 | N                               | -4.036106 | 0.792762  | -1.102990 |
| N                             | -5.067292 | 0.808540  | -1.305305 | N                               | -4.812785 | 0.834981  | -1.884951 |
| N                             | -1.971615 | 0.442706  | -0.575322 | N                               | -1.984075 | 0.526354  | -0.134576 |
| H                             | 2.908194  | -2.562224 | 0.423134  | H                               | 3.072262  | -2.614746 | 0.211346  |
| H                             | 0.565315  | -2.098931 | 0.164898  | H                               | 0.562891  | -2.192006 | 0.243139  |
| H                             | 1.411116  | 2.096579  | -0.713880 | H                               | 1.357312  | 2.037439  | -0.452095 |
| $7\text{-S}_0(\text{CASSCF})$ |           |           |           | $7\text{-S}_1(\text{CASSCF})$   |           |           |           |
| C                             | -2.271253 | -0.907784 | 0.000124  | C                               | -2.030716 | -1.210198 | 0.000010  |
| C                             | -0.937825 | -1.312521 | 0.000005  | C                               | -0.637100 | -1.208239 | -0.000496 |
| C                             | 0.109411  | -0.369099 | 0.000064  | C                               | 0.084107  | 0.002178  | -0.000706 |
| C                             | -0.231338 | 1.000501  | -0.000014 | C                               | -0.641252 | 1.210081  | -0.000488 |
| C                             | -1.563486 | 1.407526  | 0.000043  | C                               | -2.034869 | 1.207248  | 0.000013  |
| C                             | -2.583867 | 0.453086  | 0.000150  | C                               | -2.731913 | -0.002674 | 0.000310  |
| H                             | -3.057216 | -1.641233 | 0.000180  | H                               | -2.564126 | -2.143654 | 0.000327  |
| H                             | -0.698781 | -2.360425 | -0.000002 | H                               | -0.105763 | -2.142893 | -0.000479 |
| H                             | 0.548408  | 1.740183  | -0.000150 | H                               | -0.113116 | 2.146546  | -0.000476 |
| H                             | -1.806072 | 2.454905  | -0.000013 | H                               | -2.571491 | 2.138862  | 0.000340  |
| H                             | -3.612138 | 0.767639  | 0.000190  | H                               | -3.807232 | -0.004521 | 0.000858  |
| B                             | 1.565114  | -0.867287 | -0.000040 | B                               | 1.610866  | 0.004676  | -0.000240 |
| N                             | 2.720894  | -0.031654 | -0.000106 | N                               | 2.919526  | 0.000564  | 0.000260  |
| N                             | 3.840434  | 0.267399  | -0.000145 | N                               | 4.100572  | -0.001596 | 0.000879  |

| $(S_1/S_0)_{X-b}(CASSCF)$        |           |           |           | $(S_1/S_0)_{X-c}(CASSCF)$        |           |           |           |
|----------------------------------|-----------|-----------|-----------|----------------------------------|-----------|-----------|-----------|
| C                                | -2.086306 | -0.909302 | 0.000646  | C                                | -2.206623 | -0.920332 | -0.004200 |
| C                                | -0.711817 | -1.133903 | 0.000117  | C                                | -0.840859 | -1.192887 | -0.004344 |
| C                                | 0.166034  | -0.045685 | -0.001115 | C                                | 0.106821  | -0.147646 | -0.000620 |
| C                                | -0.327555 | 1.262463  | -0.000490 | C                                | -0.369333 | 1.181633  | 0.003752  |
| C                                | -1.703356 | 1.478878  | 0.000012  | C                                | -1.735393 | 1.451603  | 0.005255  |
| C                                | -2.583774 | 0.395258  | -0.000037 | C                                | -2.657536 | 0.401803  | 0.000955  |
| H                                | -2.763863 | -1.742910 | 0.001058  | H                                | -2.913195 | -1.730612 | -0.007597 |
| H                                | -0.307576 | -2.128892 | 0.000536  | H                                | -0.504535 | -2.213645 | -0.005835 |
| H                                | 0.367507  | 2.081182  | -0.000439 | H                                | 0.331134  | 1.996897  | 0.004722  |
| H                                | -2.086303 | 2.482541  | 0.000078  | H                                | -2.078754 | 2.470393  | 0.009001  |
| H                                | -3.644856 | 0.565404  | 0.000175  | H                                | -3.711909 | 0.611300  | 0.001393  |
| N                                | 1.525732  | -0.263812 | -0.000696 | B                                | 1.599166  | -0.442230 | -0.001735 |
| B                                | 2.792186  | -0.464911 | -0.000075 | N                                | 2.912856  | -0.411687 | -0.000705 |
| N                                | 4.125811  | -0.677682 | 0.001149  | N                                | 4.090445  | -0.453355 | 0.000244  |
| <b>TS6-S<sub>0</sub>(CASSCF)</b> |           |           |           | <b>TS7-S<sub>0</sub>(CASSCF)</b> |           |           |           |
| C                                | -2.285255 | -0.900715 | 0.000340  | C                                | -1.911987 | -1.197721 | -0.024079 |
| C                                | -0.959914 | -1.334258 | 0.000894  | C                                | -0.541723 | -1.350361 | -0.047492 |
| C                                | 0.112729  | -0.419207 | 0.001248  | C                                | 0.329255  | -0.244991 | -0.019657 |
| C                                | -0.200998 | 0.957290  | 0.001127  | C                                | -0.250466 | 1.037780  | 0.033108  |
| C                                | -1.523154 | 1.395070  | -0.000060 | C                                | -1.631922 | 1.194975  | 0.056404  |
| C                                | -2.567093 | 0.465772  | -0.000424 | C                                | -2.465359 | 0.077856  | 0.028086  |
| H                                | -3.087215 | -1.616894 | 0.000277  | H                                | -2.550774 | -2.062327 | -0.046050 |
| H                                | -0.745791 | -2.388052 | 0.000837  | H                                | -0.126032 | -2.341618 | -0.087875 |
| H                                | 0.589165  | 1.685961  | 0.001777  | H                                | 0.374633  | 1.907611  | 0.055733  |
| H                                | -1.740826 | 2.448162  | -0.000660 | H                                | -2.056856 | 2.181864  | 0.096657  |
| H                                | -3.587584 | 0.805048  | -0.001292 | H                                | -3.533346 | 0.201805  | 0.046631  |
| B                                | 1.537099  | -1.052756 | -0.003364 | B                                | 1.823593  | -0.686111 | -0.052909 |
| N                                | 2.701127  | 0.122495  | 0.000832  | N                                | 2.709884  | 1.202940  | 0.000323  |
| N                                | 3.779994  | 0.433321  | -0.001245 | N                                | 3.307009  | 0.210284  | -0.038867 |
| C                                | -2.285255 | -0.900715 | 0.000340  | C                                | -1.911987 | -1.197721 | -0.024079 |
| C                                | -0.959914 | -1.334258 | 0.000894  | C                                | -0.541723 | -1.350361 | -0.047492 |



| <b>8-S<sub>0</sub>(CASSCF)</b> |           |           |           | <b>8-S<sub>1</sub>(CASSCF)</b> |           |           |           |
|--------------------------------|-----------|-----------|-----------|--------------------------------|-----------|-----------|-----------|
| C                              | -0.966522 | -1.211577 | -0.000010 | C                              | 0.952143  | -1.231804 | -0.000009 |
| C                              | 0.424185  | -1.215905 | -0.000035 | C                              | -0.413593 | -1.256369 | -0.000191 |
| C                              | 1.152455  | -0.008380 | 0.000055  | C                              | -1.190174 | -0.003395 | -0.000010 |
| C                              | 0.424024  | 1.217717  | -0.000017 | C                              | -0.417552 | 1.259438  | -0.000188 |
| C                              | -0.972616 | 1.212832  | -0.000008 | C                              | 0.949742  | 1.229646  | 0.000023  |
| C                              | -1.663427 | 0.002557  | 0.000027  | C                              | 1.669213  | -0.000371 | 0.000194  |
| H                              | -1.508806 | -2.140132 | -0.000016 | H                              | 1.497056  | -2.158223 | -0.000037 |
| H                              | 0.950736  | -2.154960 | -0.000049 | H                              | -0.934632 | -2.193148 | -0.000412 |
| H                              | 0.955581  | 2.153890  | -0.000039 | H                              | -0.935718 | 2.197723  | -0.000474 |
| H                              | -1.514600 | 2.141526  | -0.000020 | H                              | 1.496342  | 2.155225  | -0.000004 |
| H                              | -2.738839 | 0.000324  | 0.000024  | H                              | 2.740349  | 0.000292  | 0.000330  |
| B                              | 2.711577  | 0.002202  | 0.000080  | B                              | -2.639510 | 0.001035  | 0.000772  |
| <b>8-T<sub>1</sub>(CASSCF)</b> |           |           |           |                                |           |           |           |
| C                              | 0.964488  | -1.207284 | 0.000015  |                                |           |           |           |
| C                              | -0.424307 | -1.217878 | 0.000053  |                                |           |           |           |
| C                              | -1.162975 | -0.007015 | 0.000094  |                                |           |           |           |
| C                              | -0.421047 | 1.223965  | 0.000049  |                                |           |           |           |
| C                              | 0.971621  | 1.209950  | 0.000005  |                                |           |           |           |
| C                              | 1.671626  | 0.002099  | 0.000005  |                                |           |           |           |
| H                              | 1.499841  | -2.140147 | -0.000029 |                                |           |           |           |
| H                              | -0.941020 | -2.161983 | 0.000013  |                                |           |           |           |
| H                              | -0.943032 | 2.164833  | 0.000015  |                                |           |           |           |
| H                              | 1.509057  | 2.141674  | -0.000037 |                                |           |           |           |
| H                              | 2.746737  | -0.000672 | -0.000027 |                                |           |           |           |
| B                              | -2.697323 | -0.007494 | -0.000162 |                                |           |           |           |

| 1-S <sub>0</sub> (B3LYP) |           |           |           | 1-S <sub>0</sub> (CAM-B3LYP) |           |           |           |
|--------------------------|-----------|-----------|-----------|------------------------------|-----------|-----------|-----------|
| C                        | 2.936384  | 0.823247  | 0.001480  | C                            | 2.925686  | 0.830236  | 0.002460  |
| C                        | 1.548094  | 0.927225  | 0.001559  | C                            | 1.542394  | 0.931070  | 0.002650  |
| C                        | 0.728805  | -0.217570 | 0.000199  | C                            | 0.730244  | -0.210133 | 0.000379  |
| C                        | 1.366339  | -1.474754 | -0.001220 | C                            | 1.365648  | -1.459852 | -0.002036 |
| C                        | 2.752715  | -1.582887 | -0.001357 | C                            | 2.746923  | -1.565920 | -0.002340 |
| C                        | 3.541846  | -0.432463 | -0.000003 | C                            | 3.530315  | -0.419051 | -0.000085 |
| H                        | 3.544999  | 1.720407  | 0.002576  | H                            | 3.532219  | 1.727862  | 0.004306  |
| H                        | 1.114978  | 1.918865  | 0.002782  | H                            | 1.107691  | 1.921954  | 0.004767  |
| H                        | 0.759825  | -2.372868 | -0.002246 | H                            | 0.757872  | -2.356337 | -0.003709 |
| H                        | 3.219513  | -2.561502 | -0.002499 | H                            | 3.214869  | -2.543117 | -0.004291 |
| H                        | 4.623190  | -0.514151 | -0.000085 | H                            | 4.611094  | -0.498729 | -0.000277 |
| B                        | -0.823978 | -0.158810 | 0.000232  | B                            | -0.822166 | -0.164339 | 0.000510  |
| N                        | -1.544432 | -1.417412 | 0.000326  | N                            | -1.525085 | -1.425212 | 0.000855  |
| N                        | -1.662737 | 1.024389  | 0.000214  | N                            | -1.671516 | 1.004005  | 0.000145  |
| N                        | -2.775210 | -1.458536 | 0.000419  | N                            | -2.754654 | -1.456817 | 0.000748  |
| N                        | -1.319233 | 2.199464  | -0.000762 | N                            | -1.332349 | 2.178225  | -0.001285 |
| N                        | -3.892075 | -1.615395 | 0.000574  | N                            | -3.864592 | -1.596212 | 0.000759  |
| N                        | -1.147415 | 3.316991  | -0.001576 | N                            | -1.160400 | 3.286291  | -0.002581 |
